# Supplementary material
Source: MDPI journal article supplement (https://www.mdpi.com/2079-6439/10/6/53)
Supplement: s1 [file s1 › fibers-1687574-supplementary.pdf]

## Material

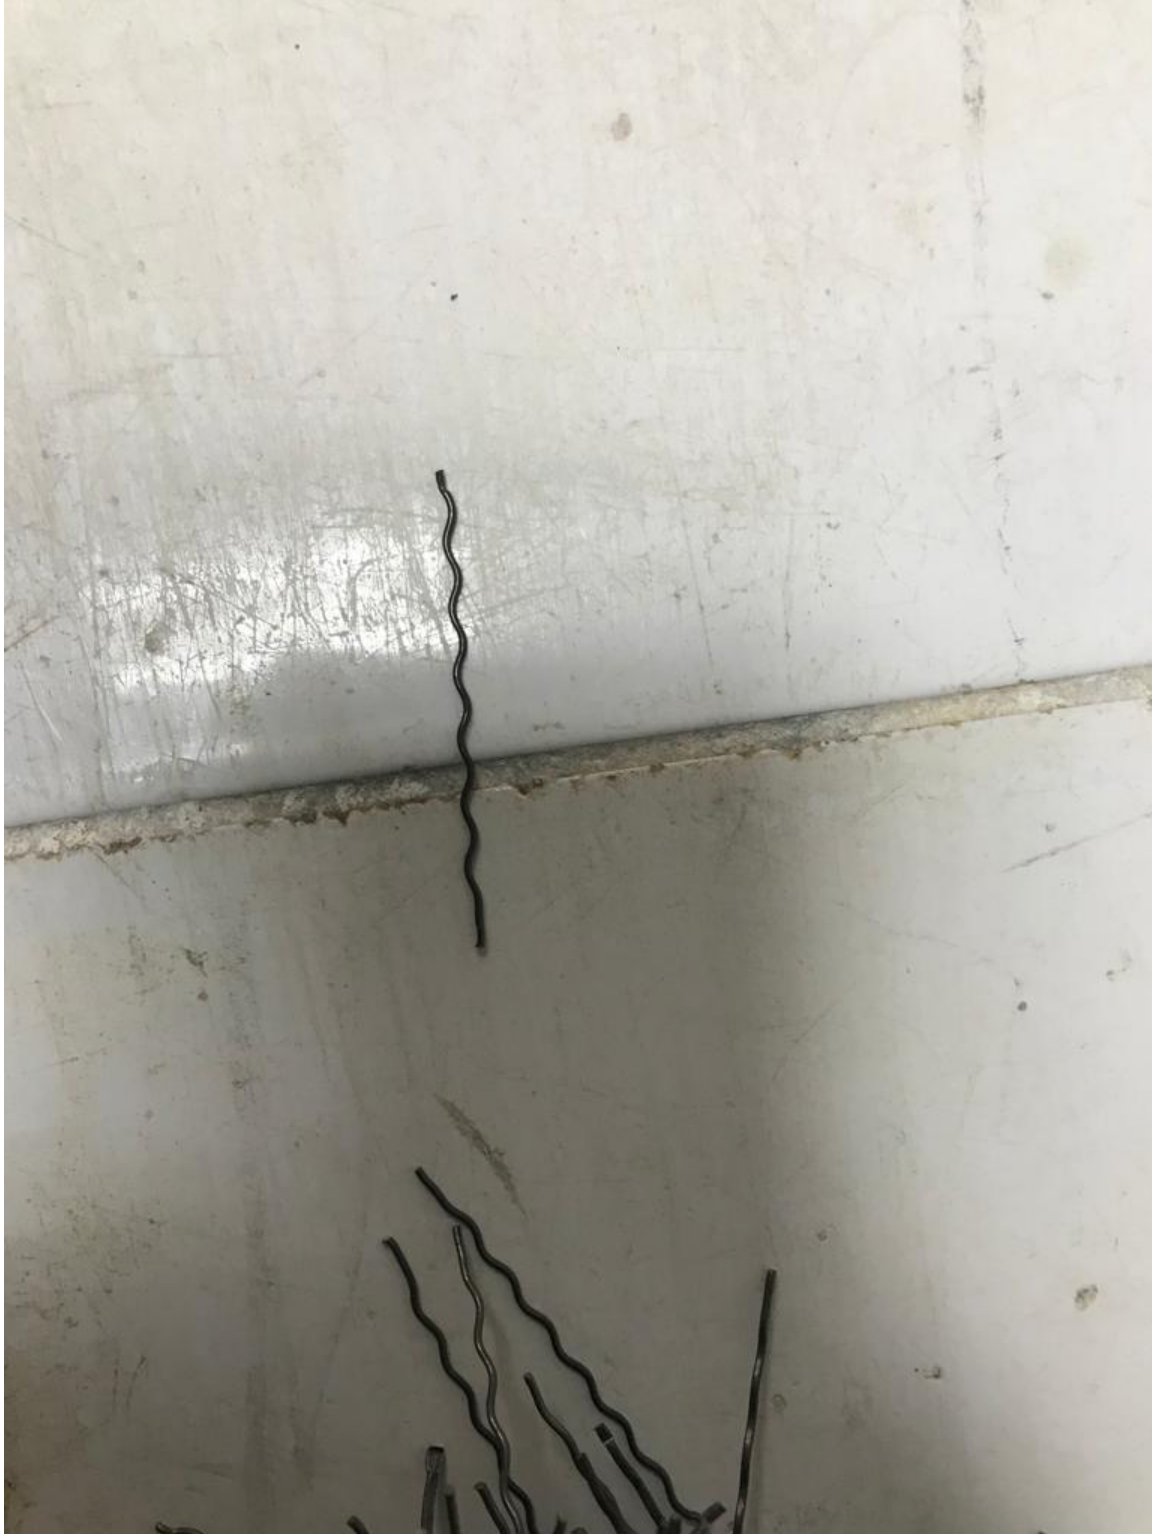

Figure S1: Shape of Steel Fiber

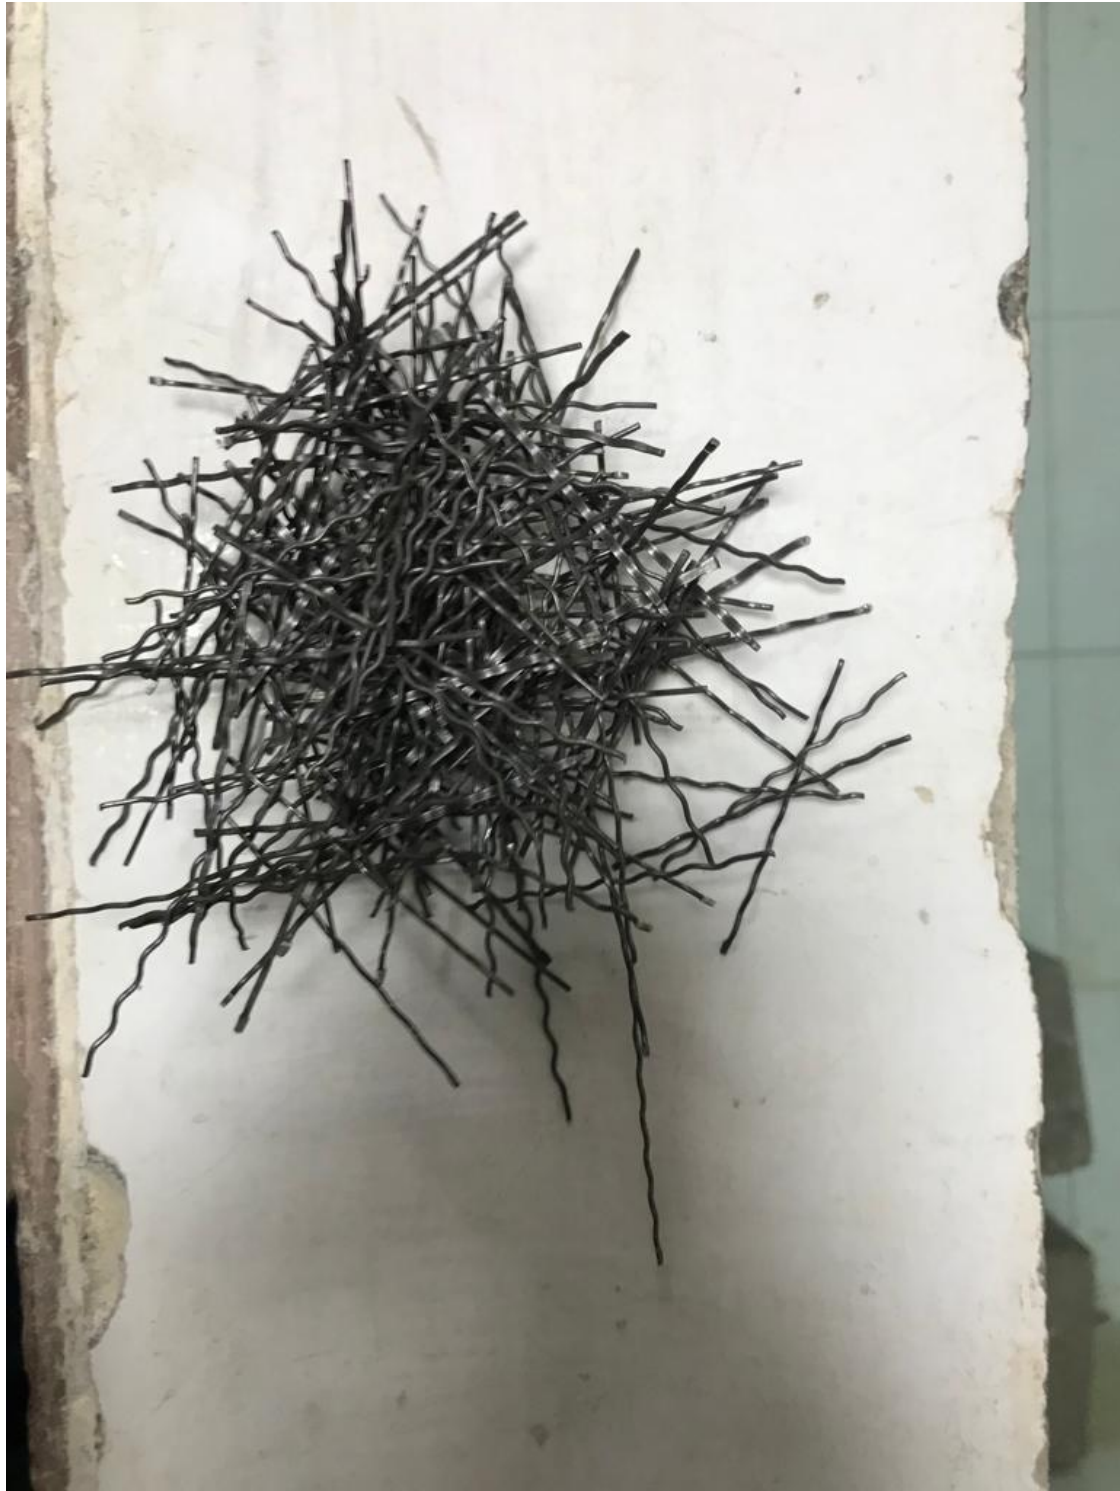

Figure S2: Shape of Steel Fiber

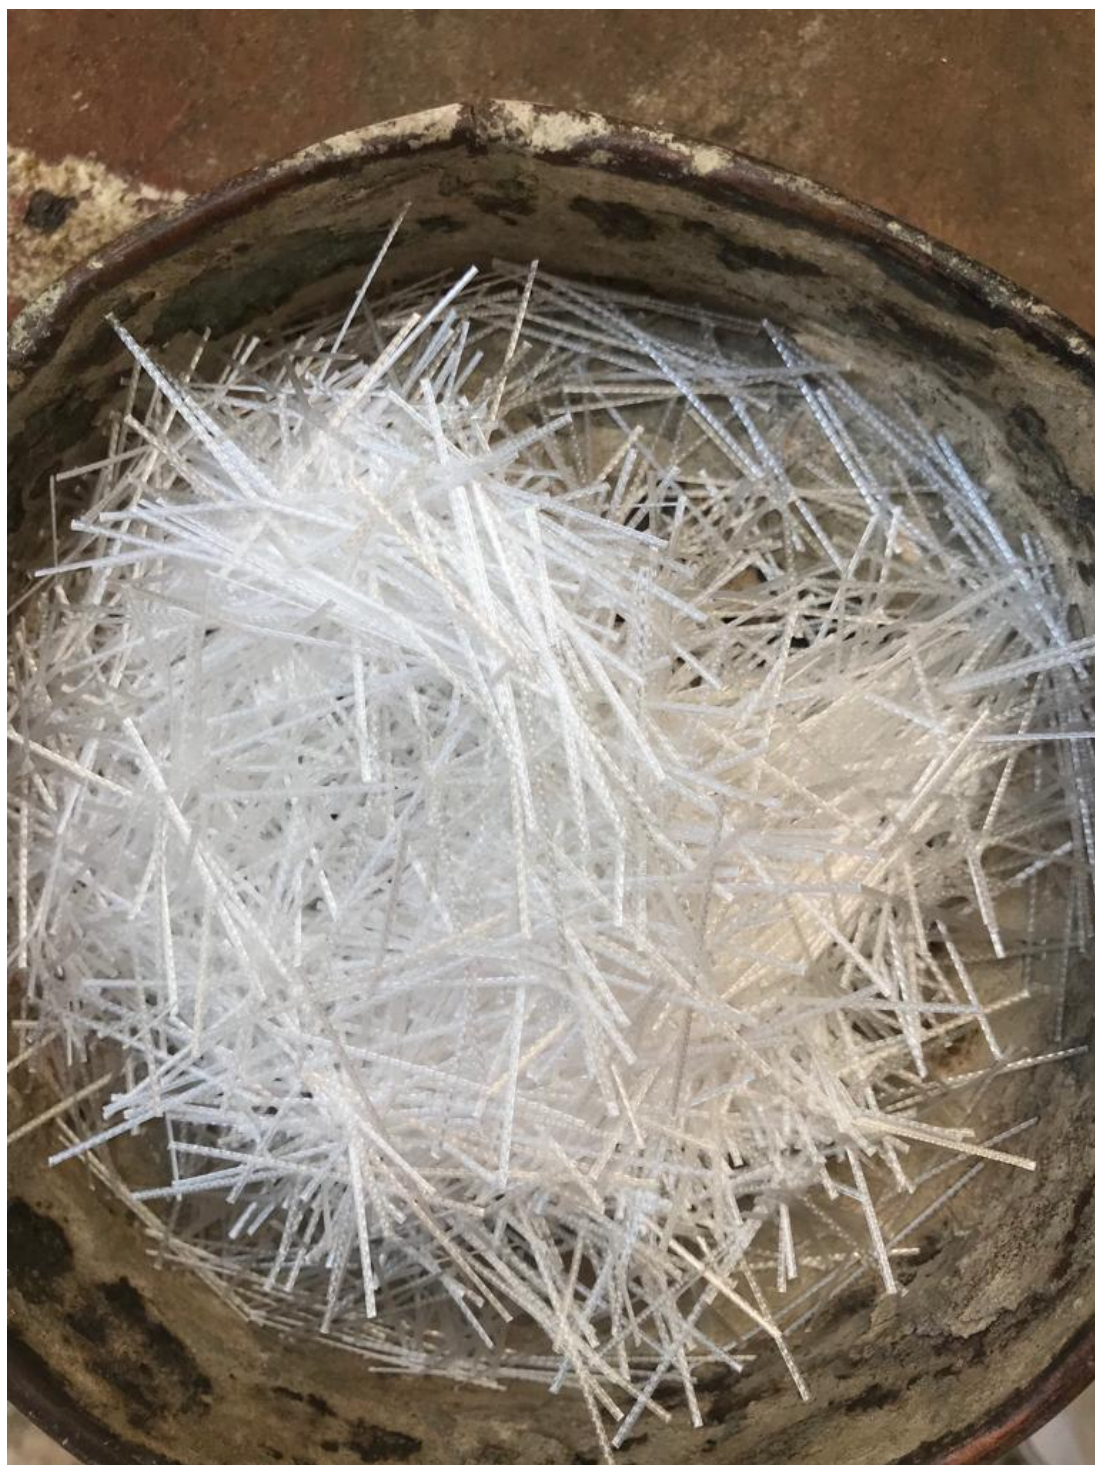

Figure S3: Shape of Polypropylene Fiber

## Mixing

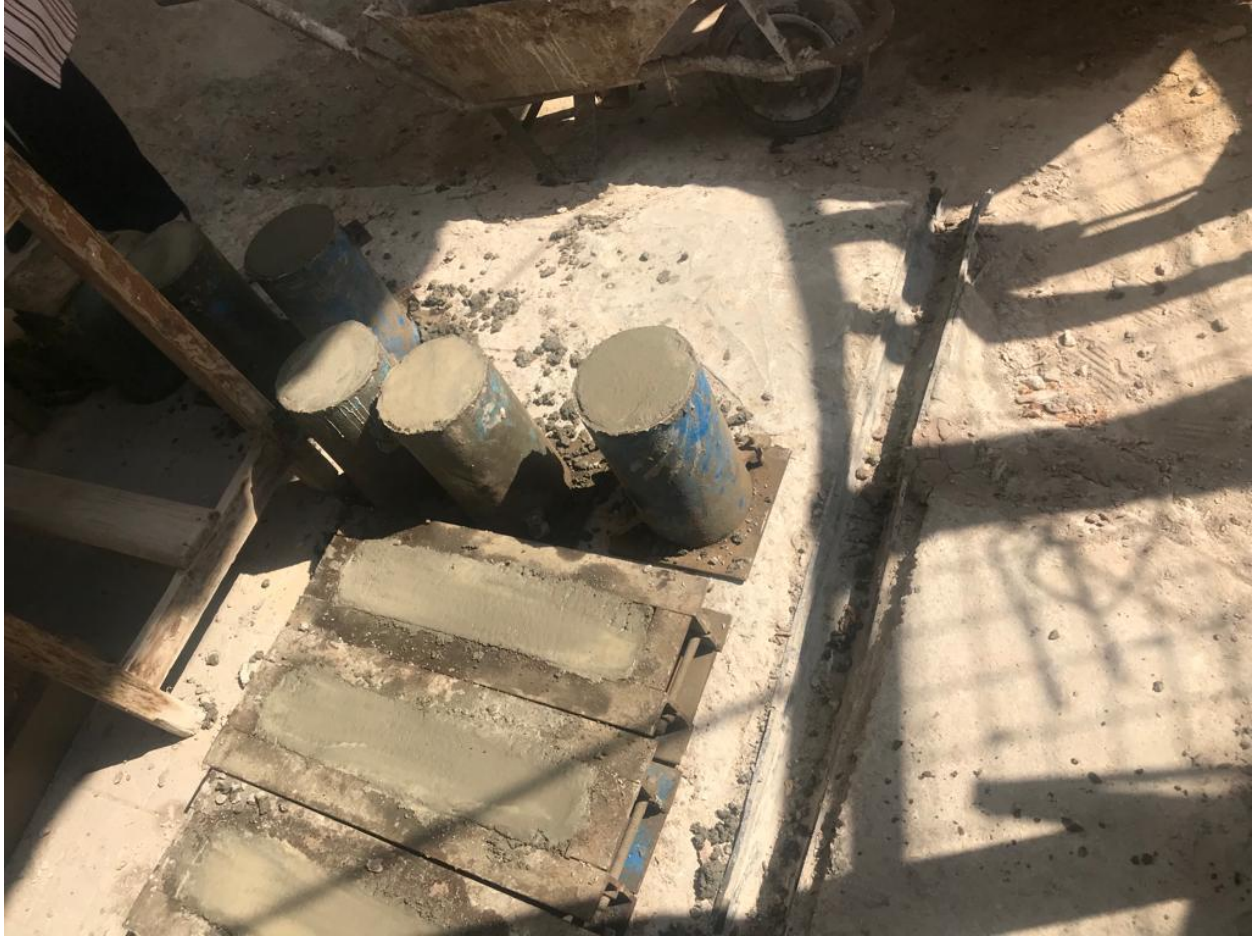

Figure S4: Flexural beam and cylindrical

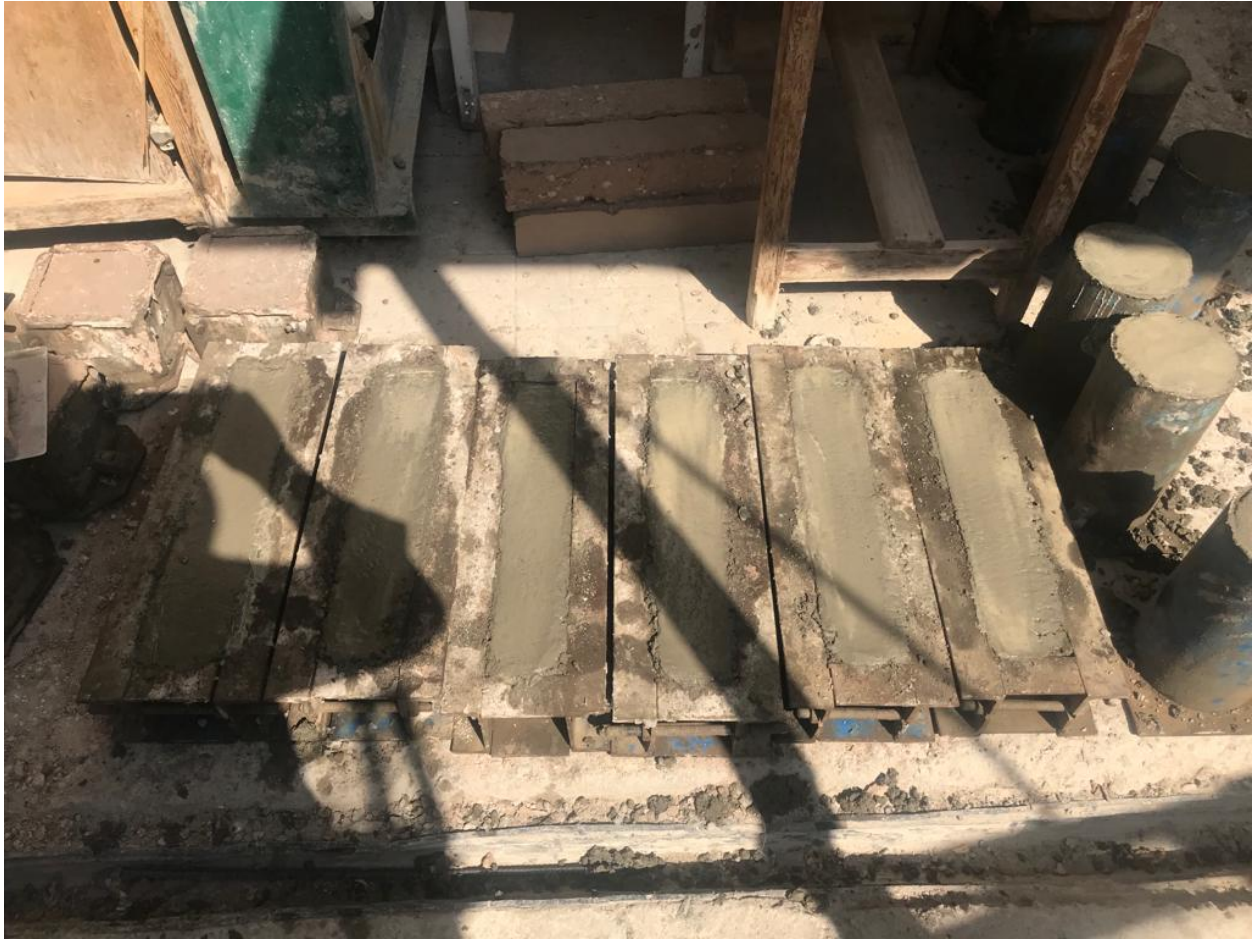

Figure S5: Flexural beam and cylindrical

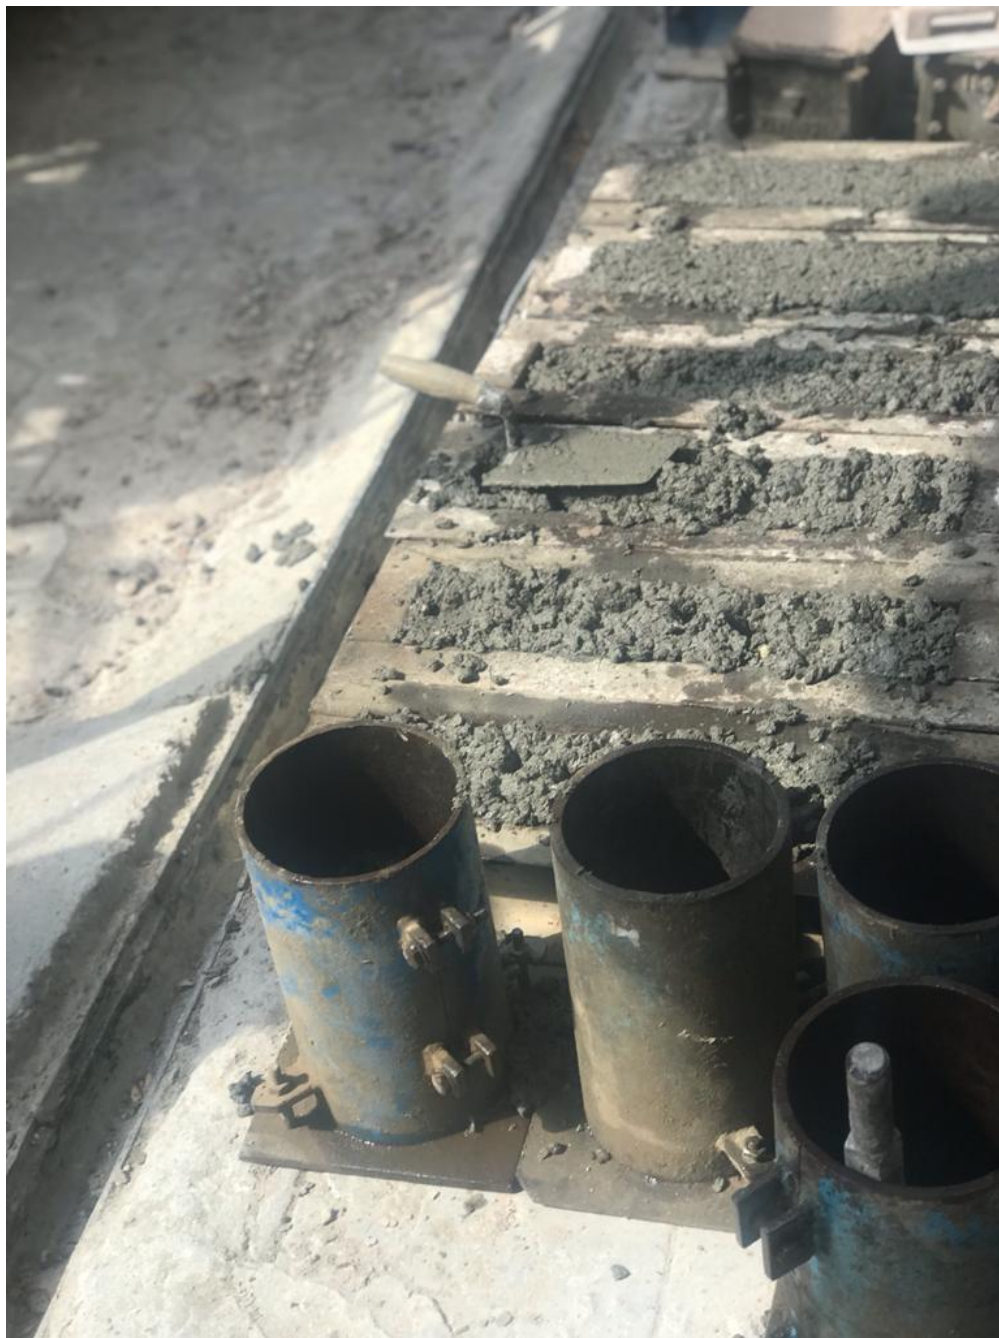

Figure S6: Preparation of different Mixes

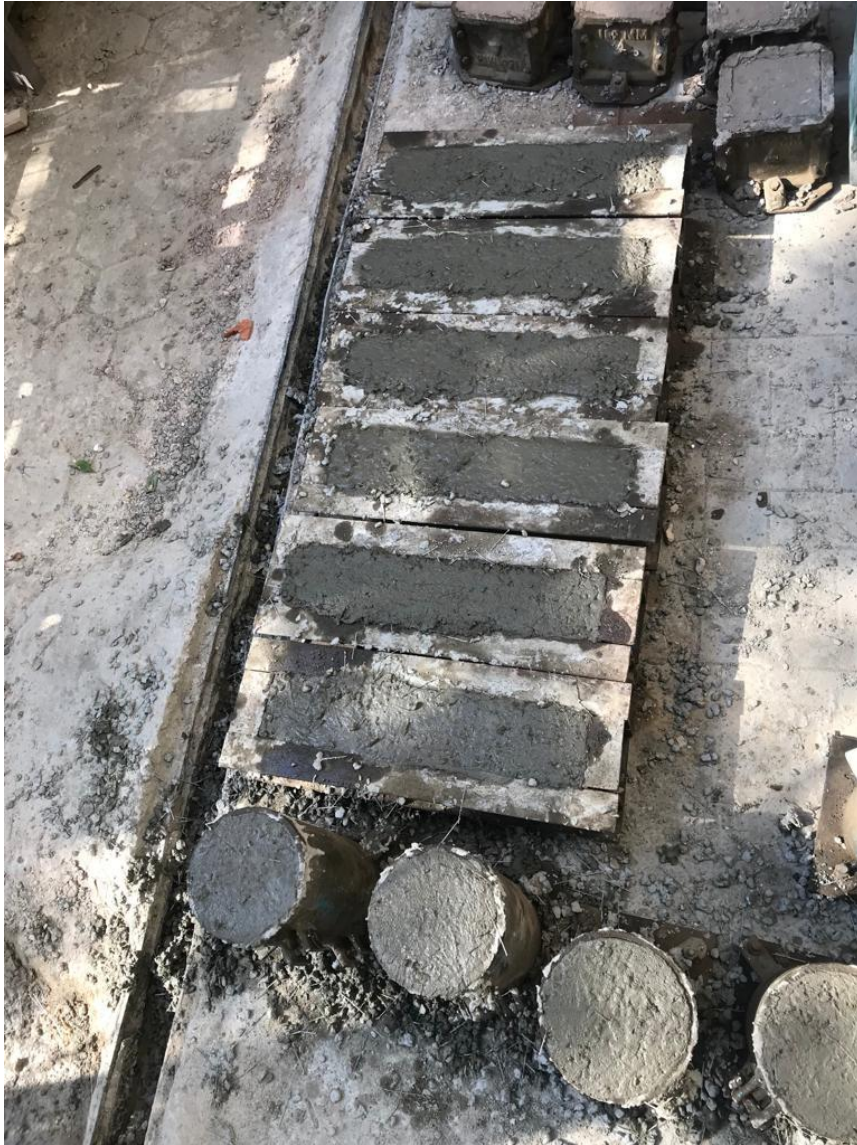

Figure S7: Flexural beam and cylindrical

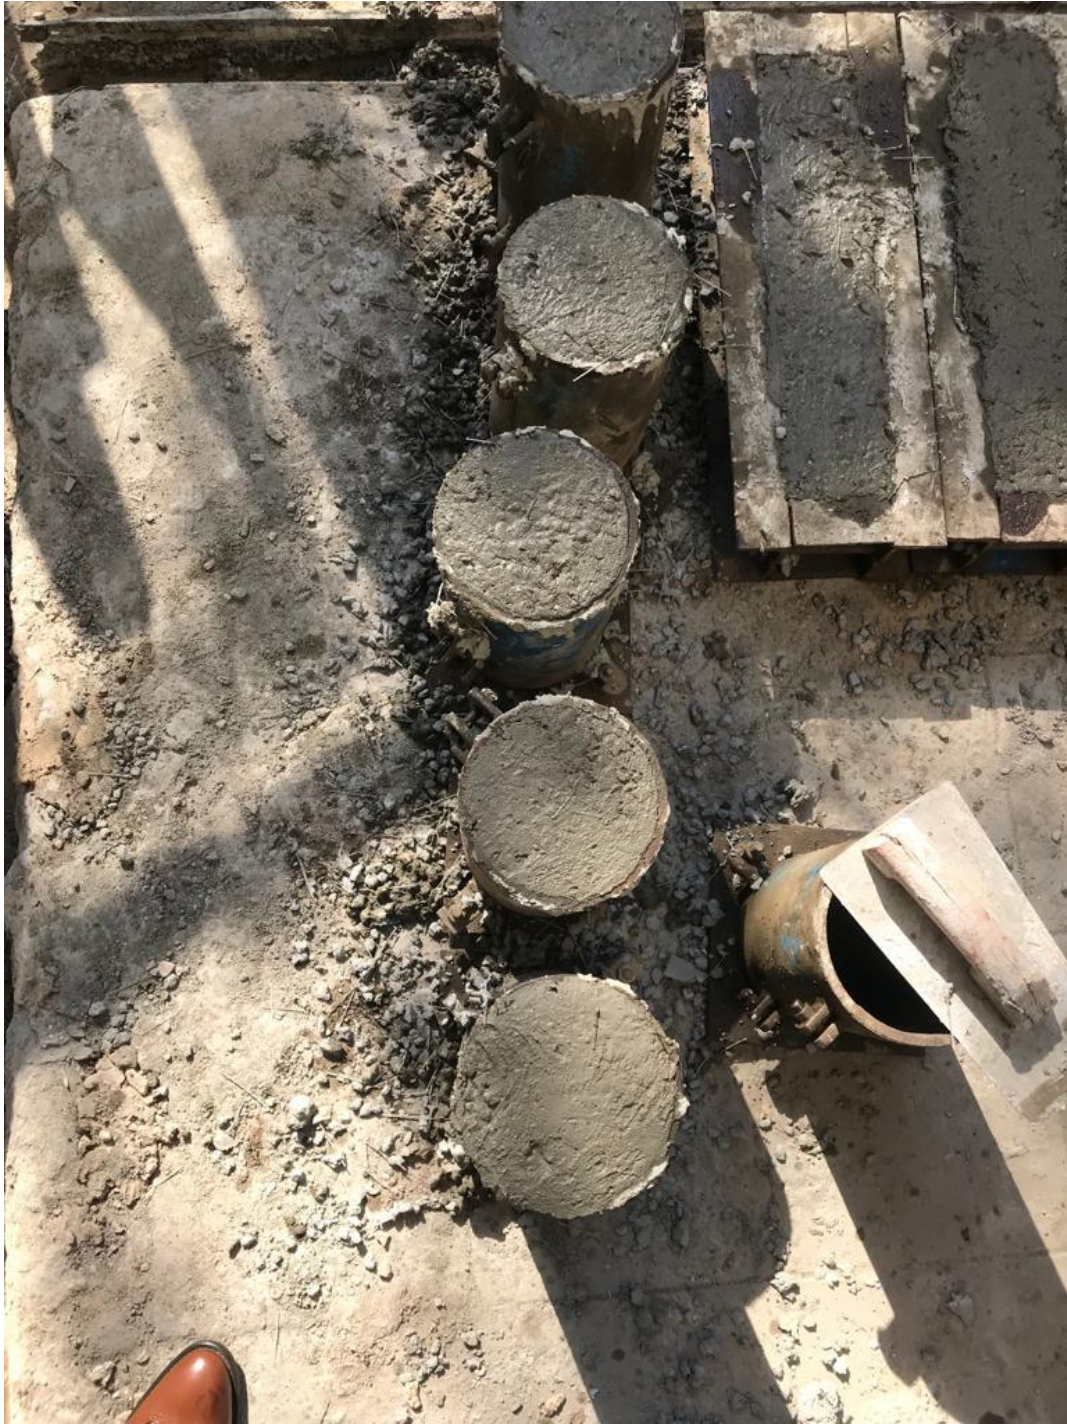

Figure S8: Flexural beam and cylindrical

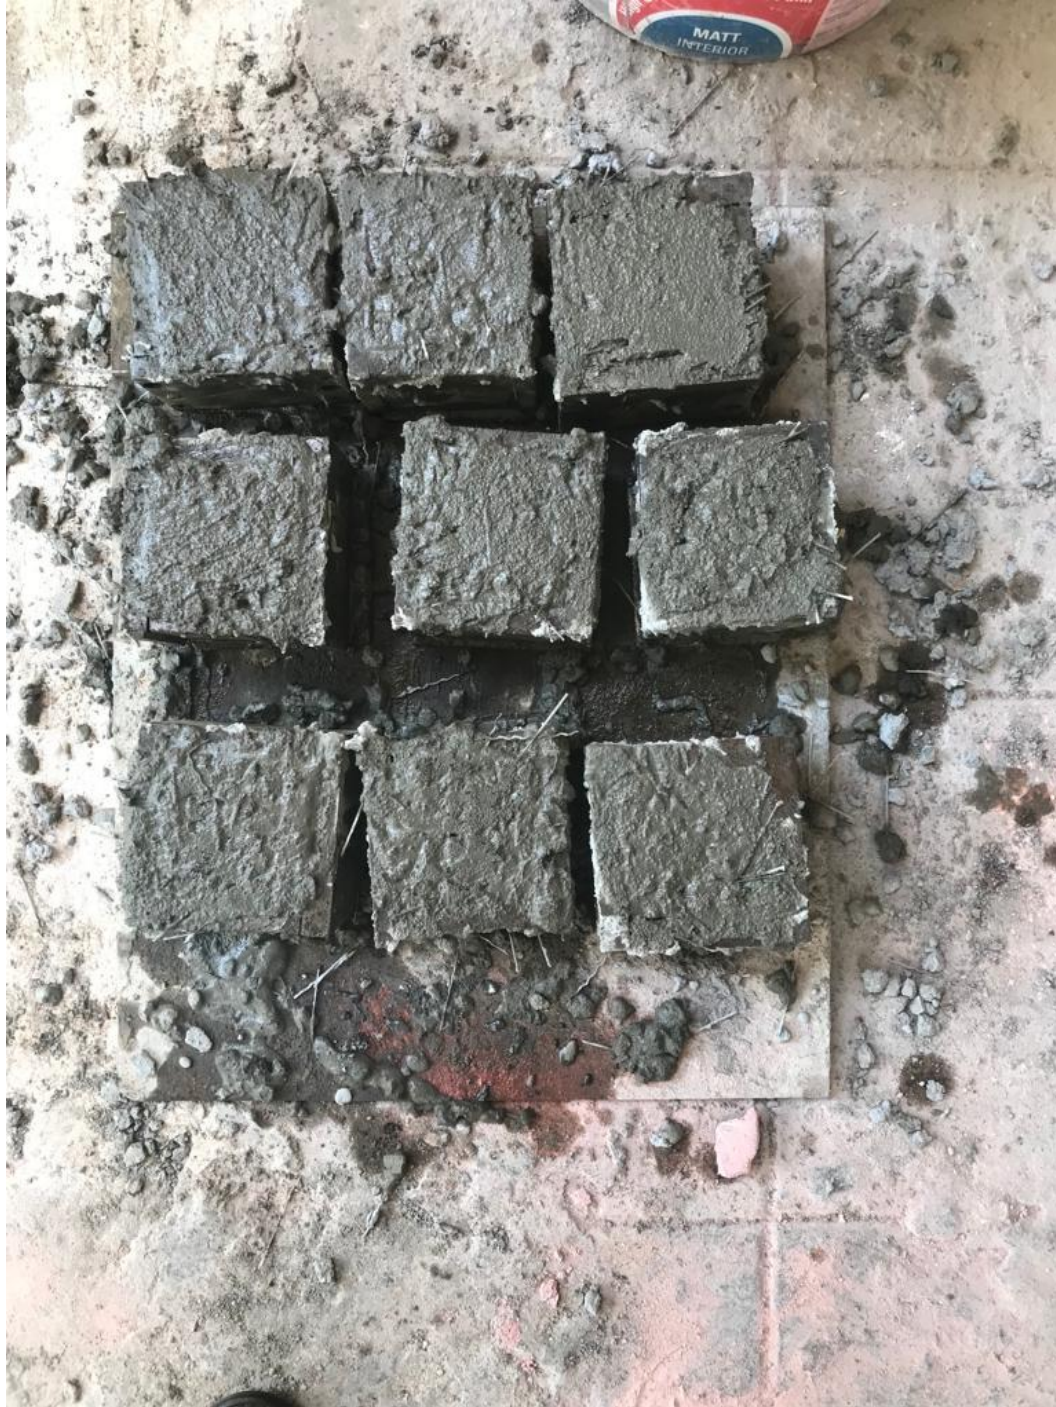

Figure S9: Preparation of compressive cubes

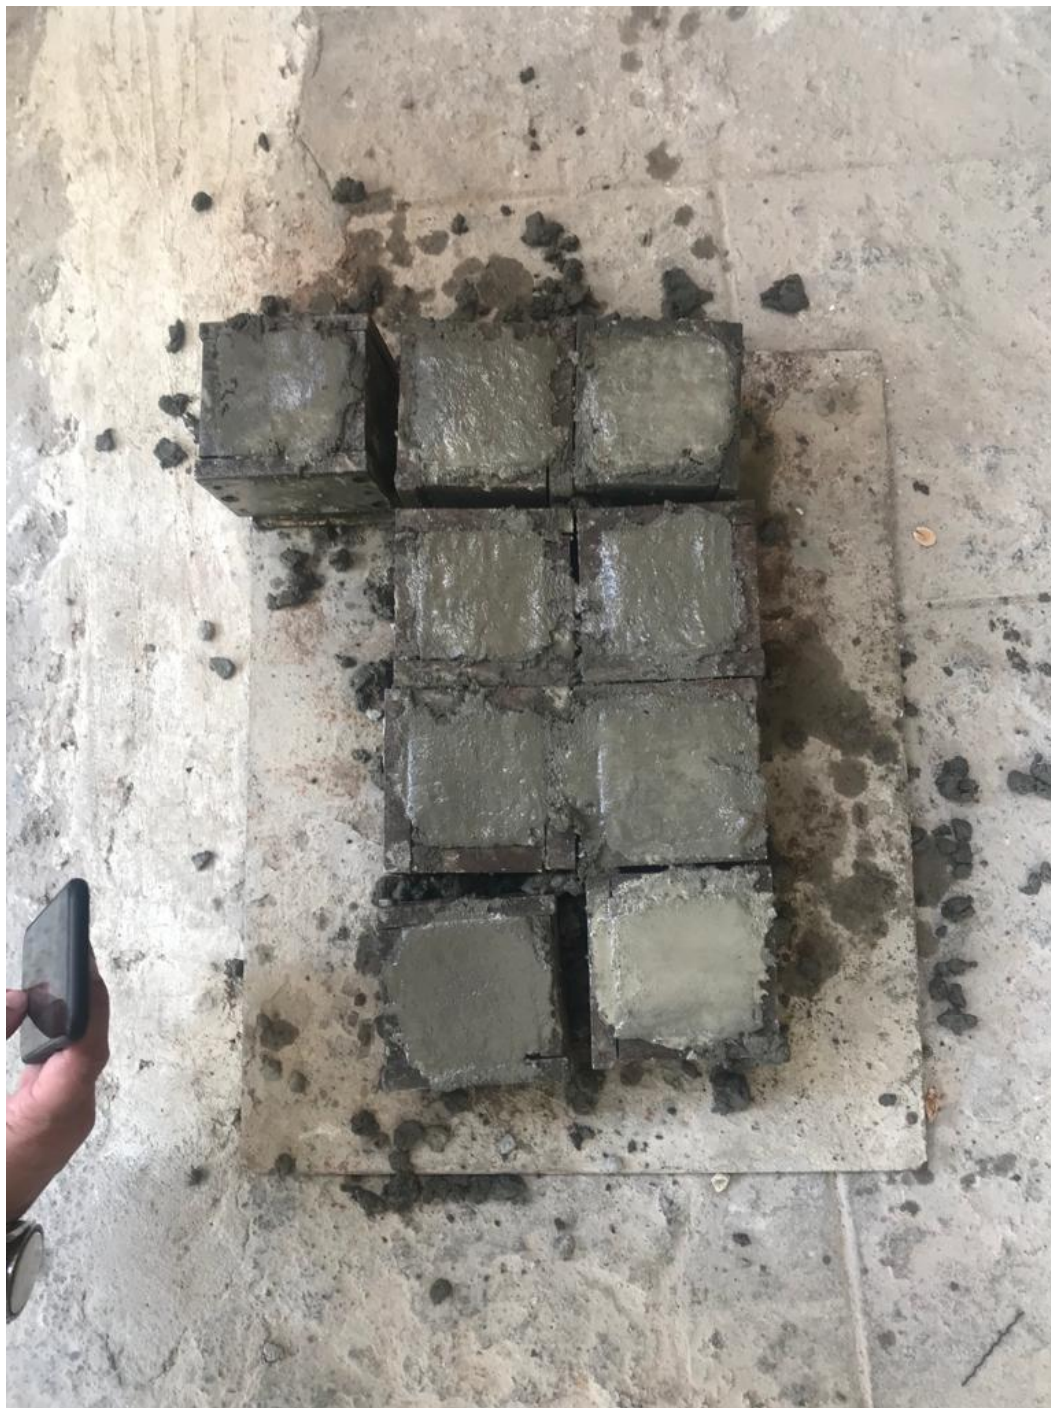

Figure S10: Preparation of compressive cubes

## Test Setup

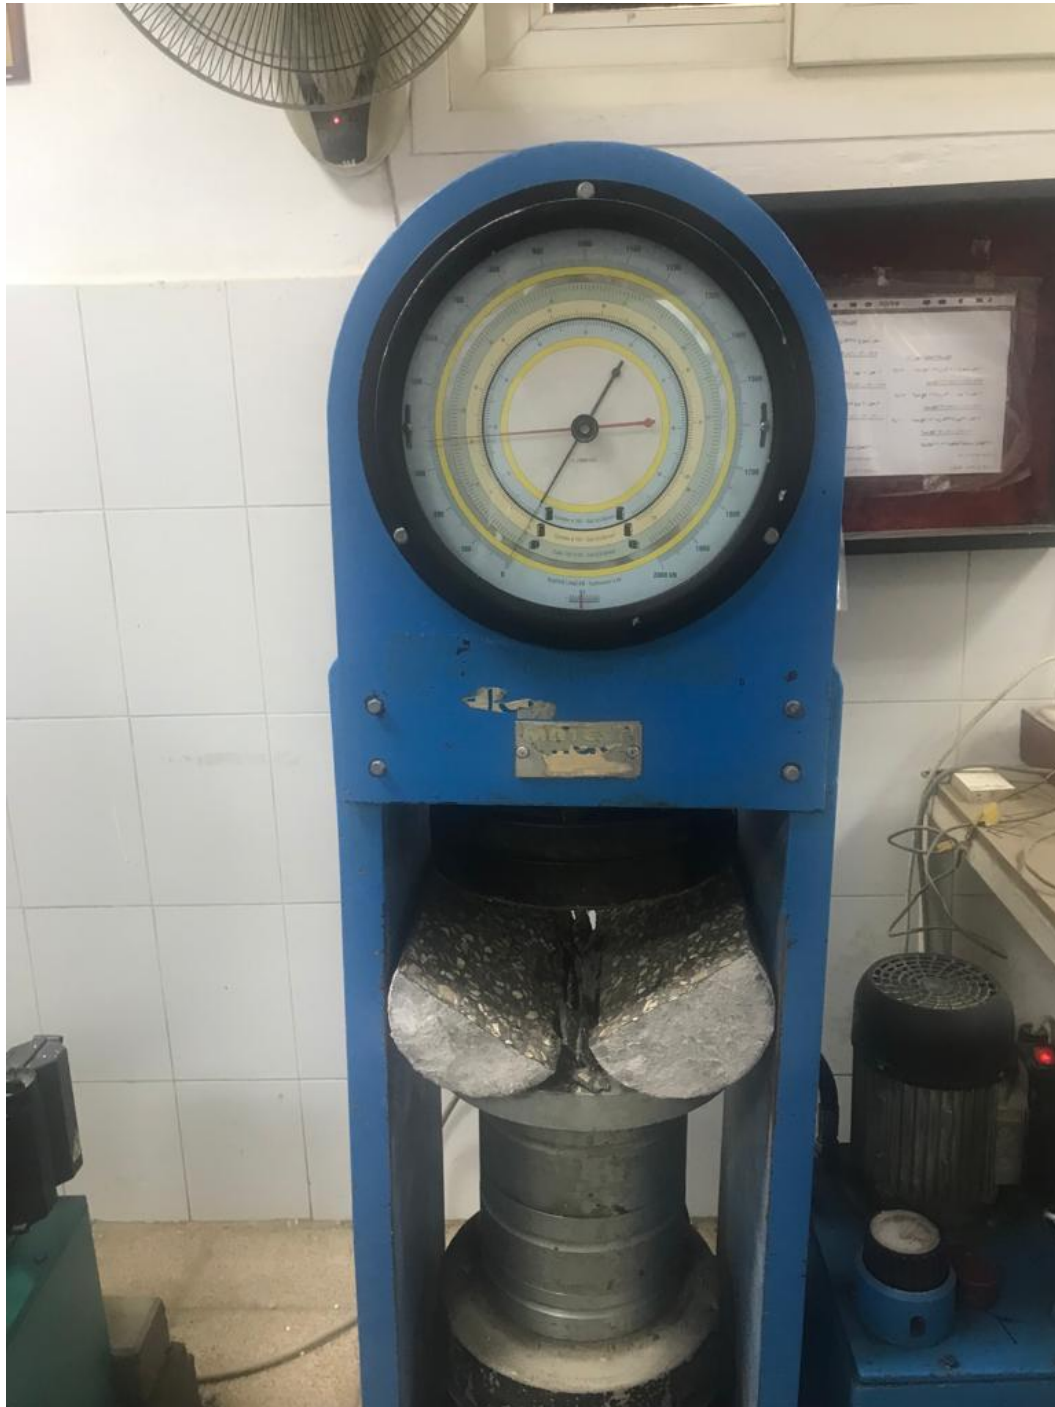

Figure S11: Test setup for tensile strength

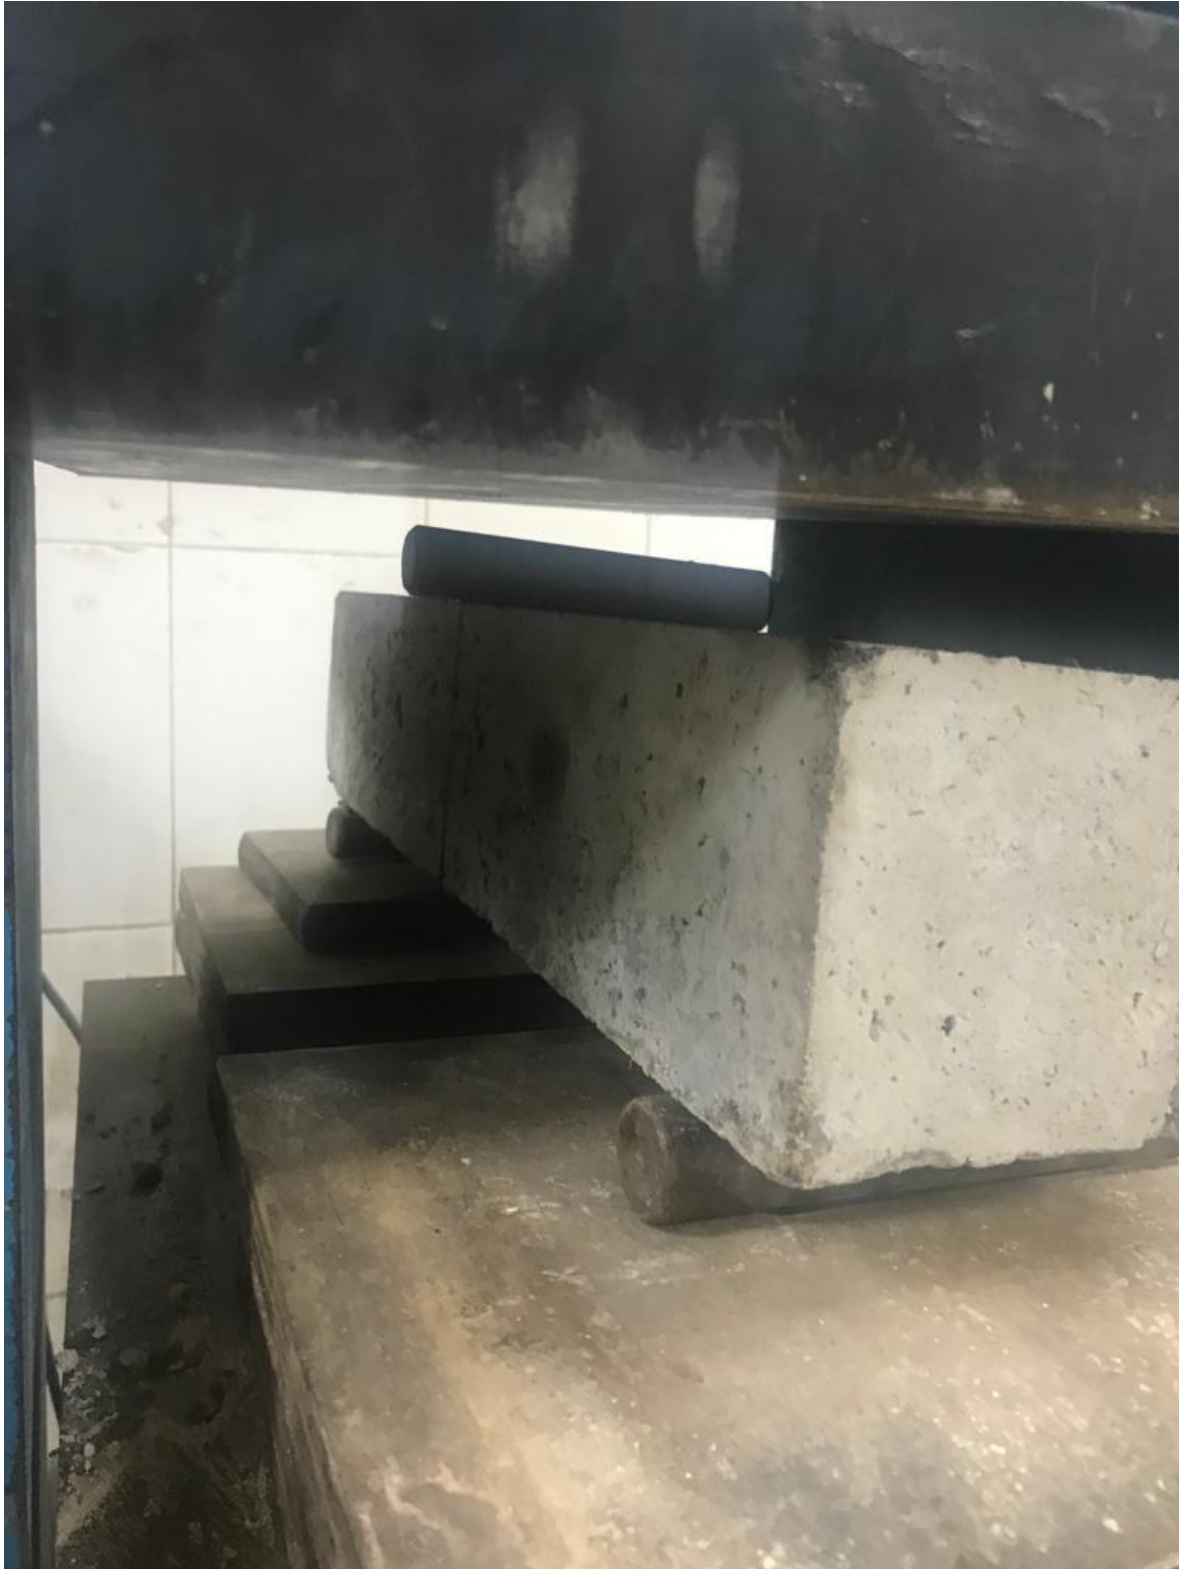

Figure S12: Test setup for Flexural strength

## Failure of Specimen

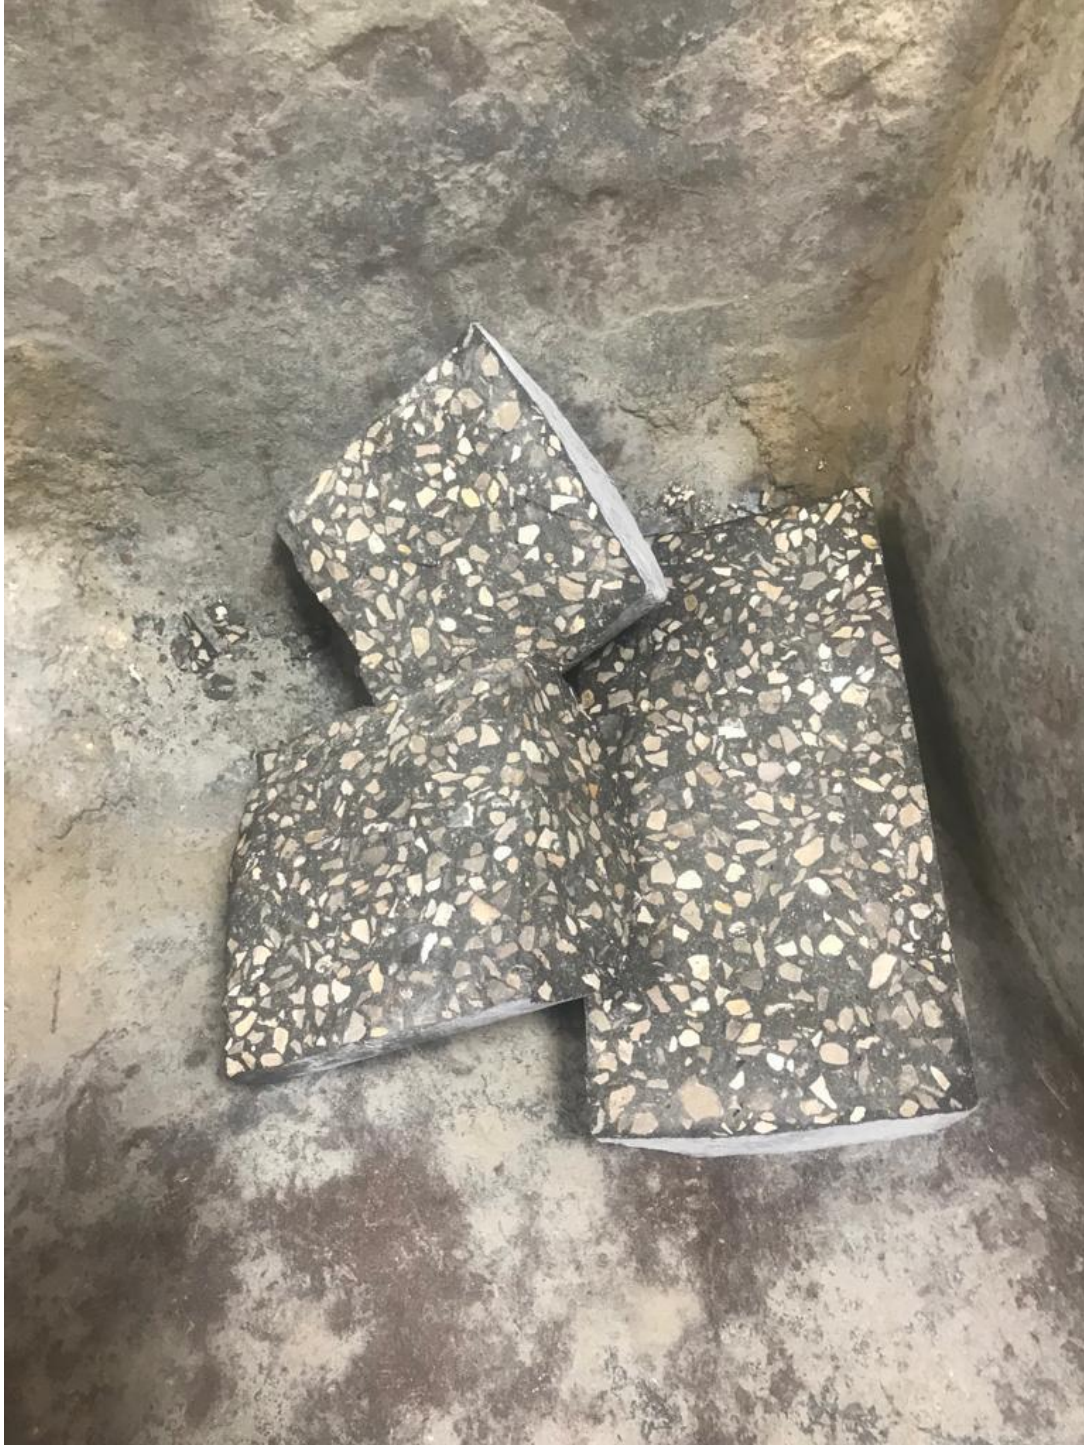

Figure S13: Sample tensile failure

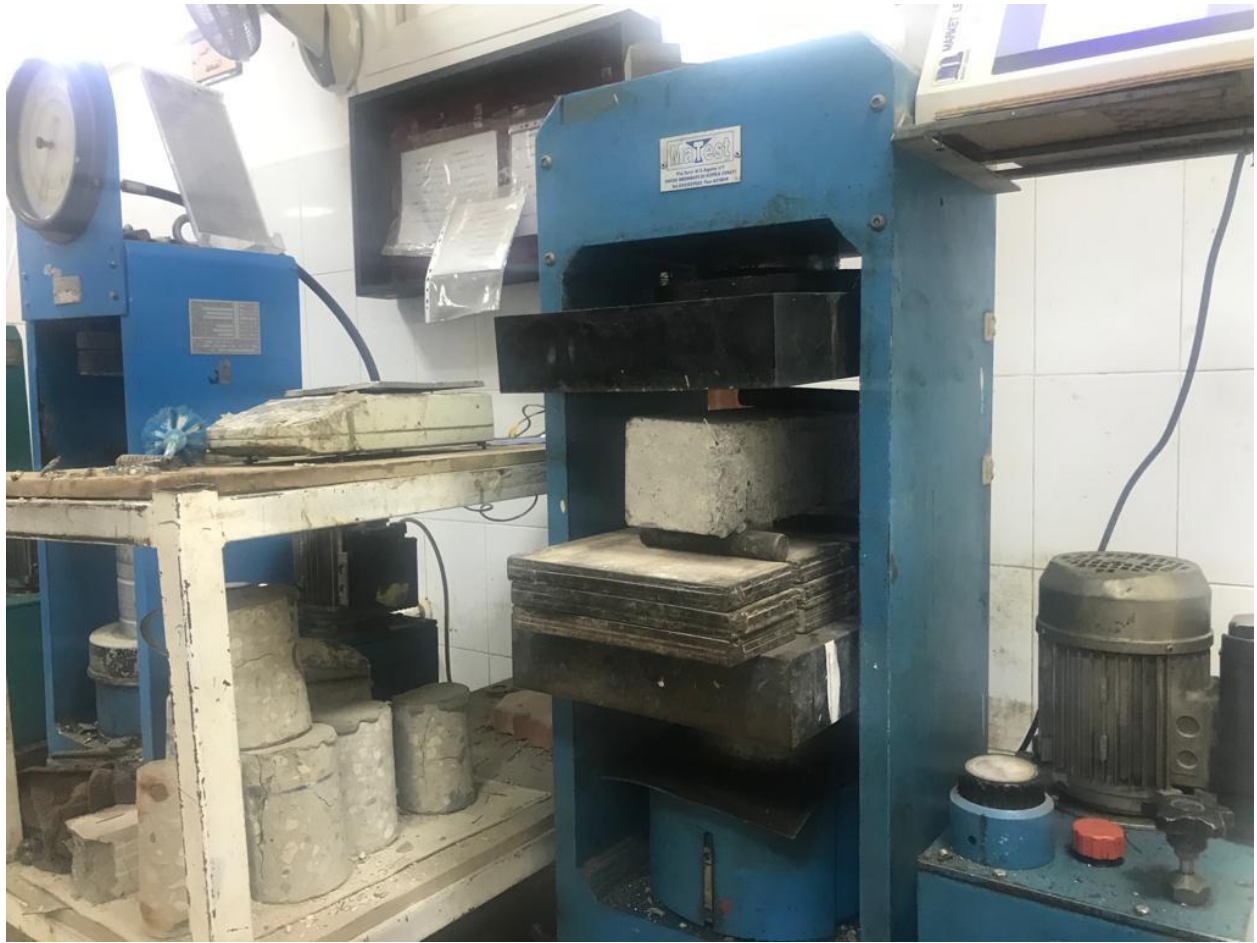

Figure S14: Sample flexural failure

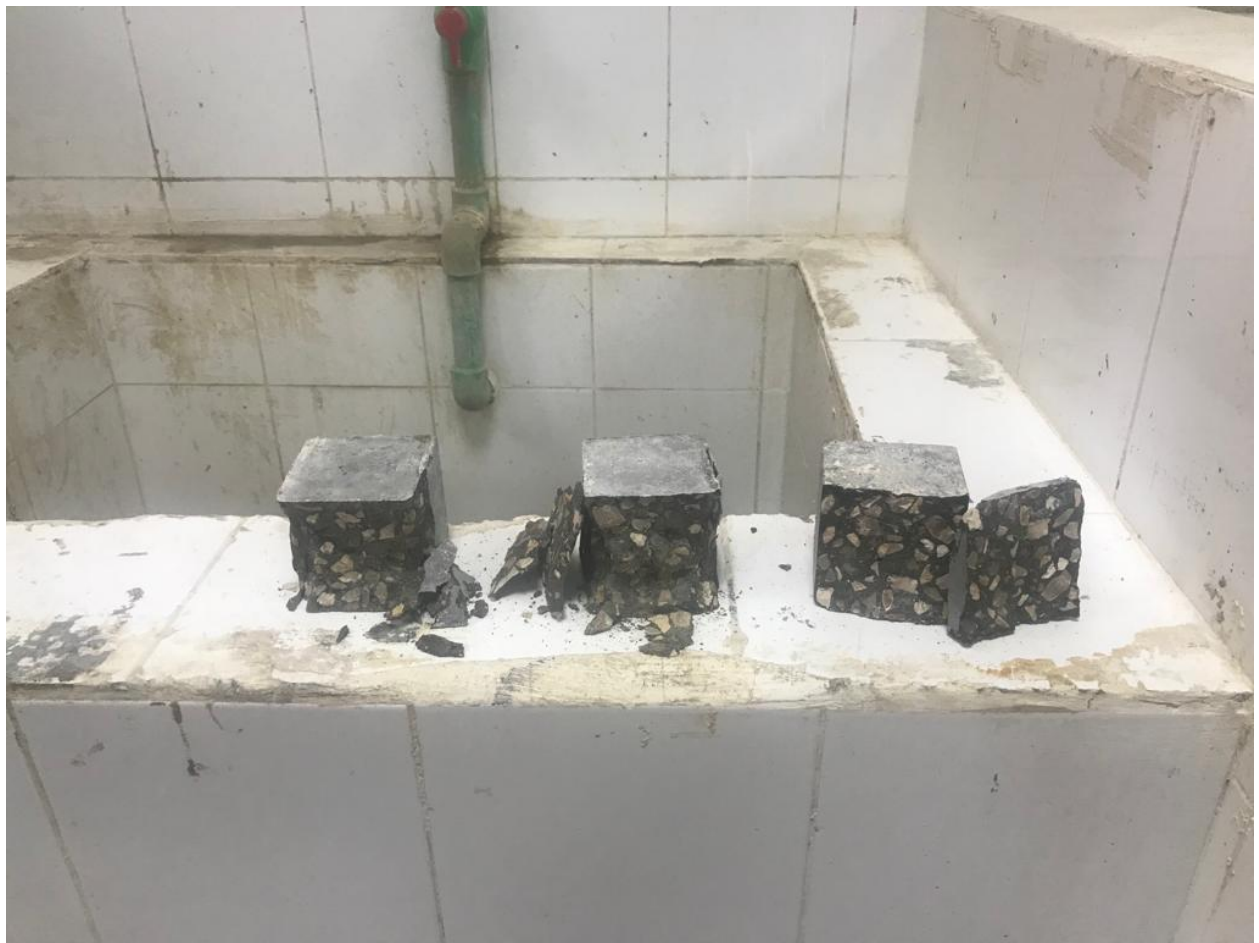

Figure S15: Sample compressive strength failure

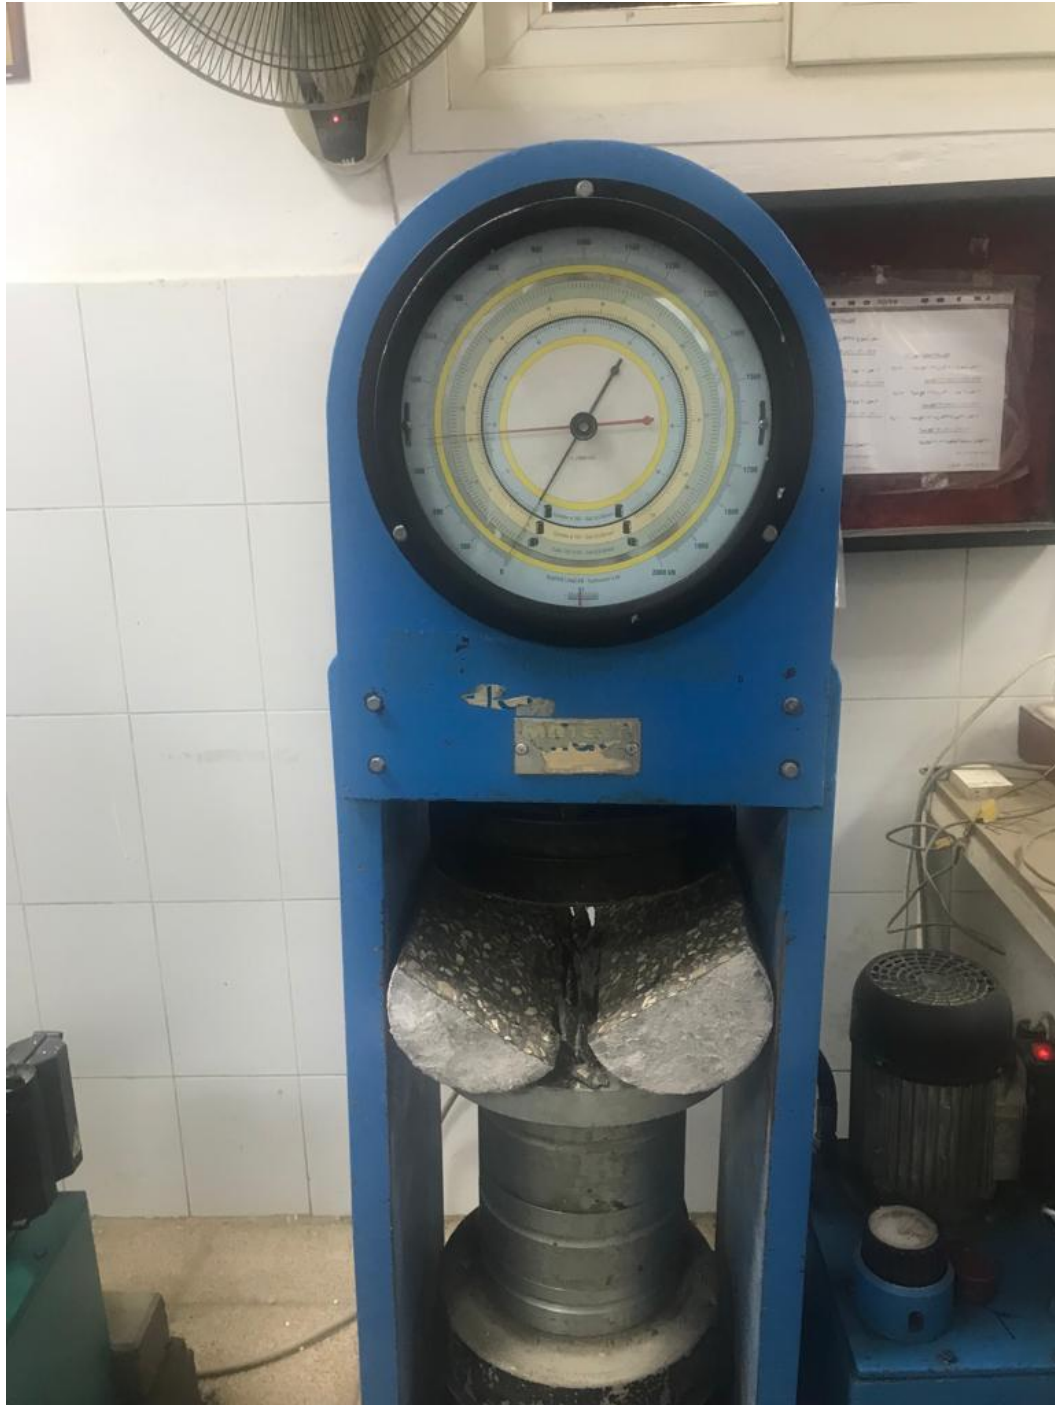

Figure S16: Sample compressive strength failure

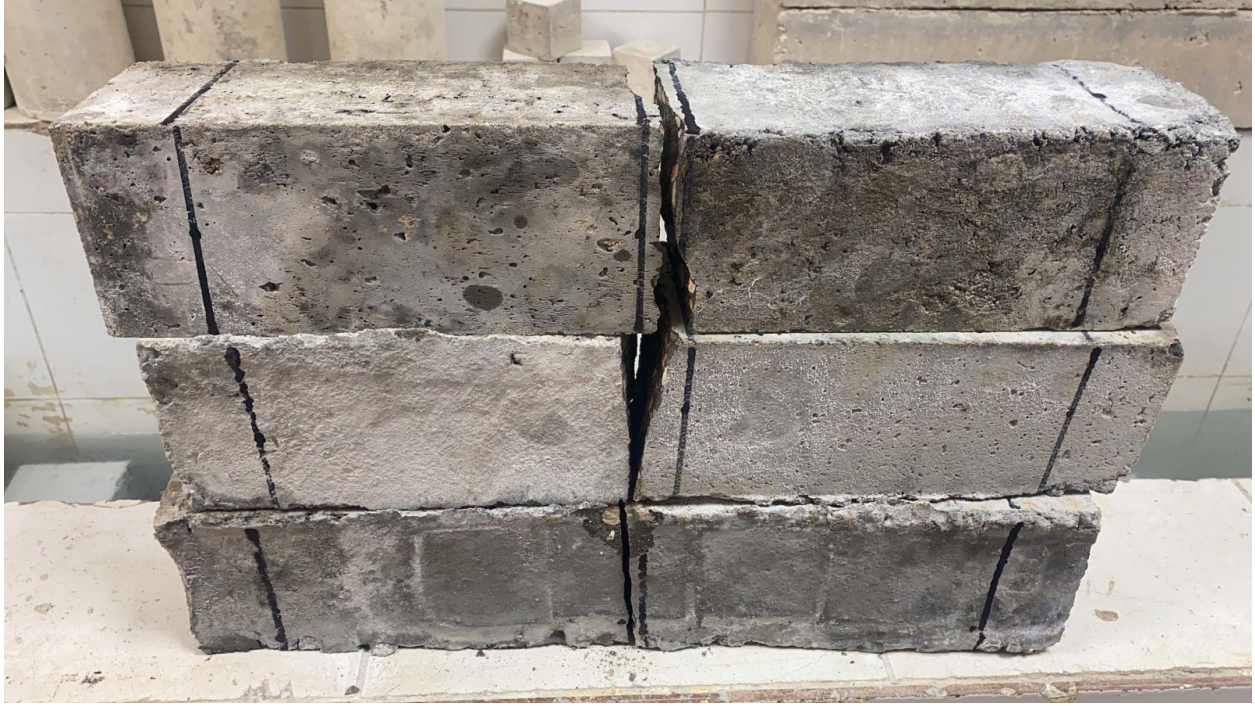

Figure S17: Sample Flexural strength failure

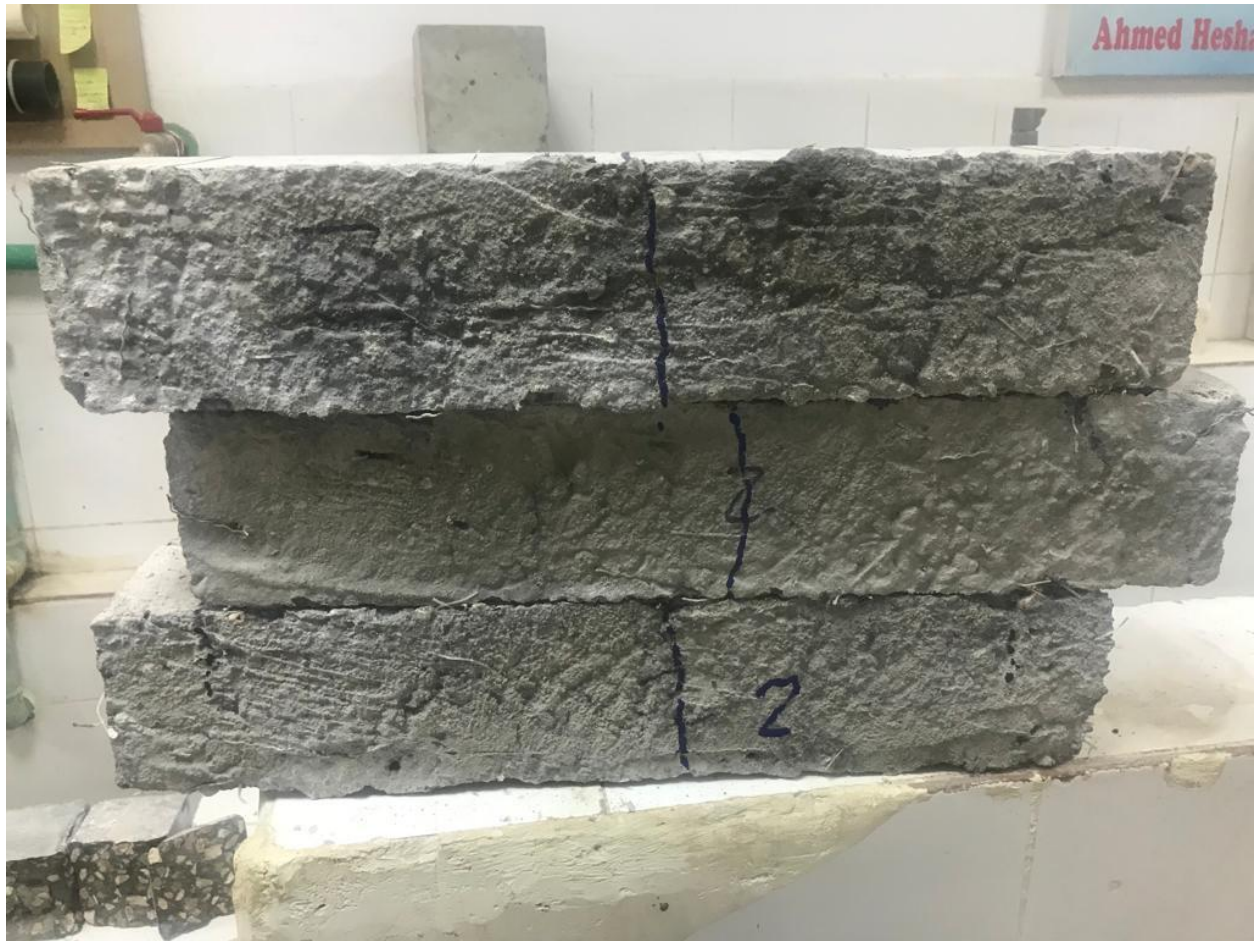

Figure S18: Sample Flexural strength failure

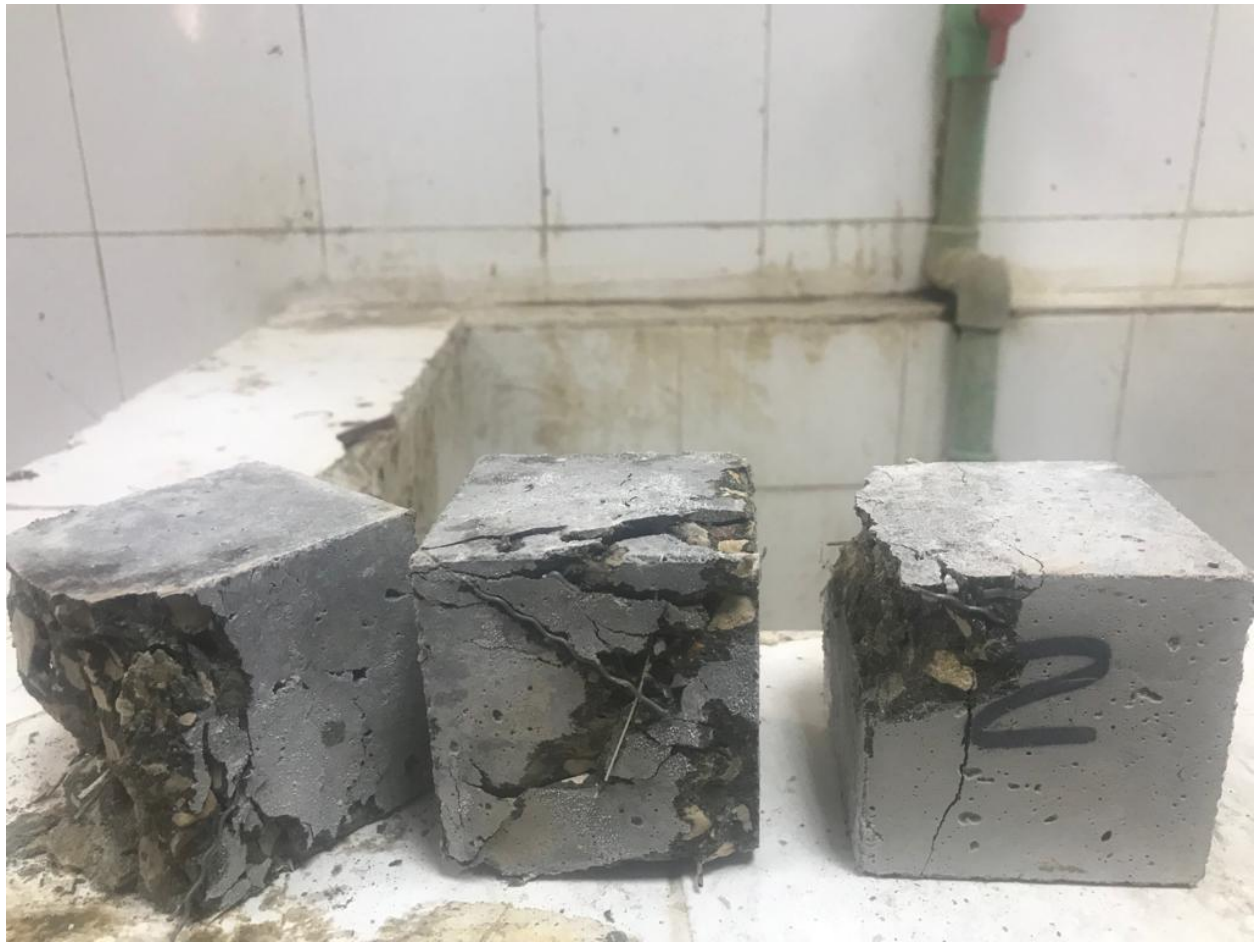

Figure S19: Sample compressive strength failure

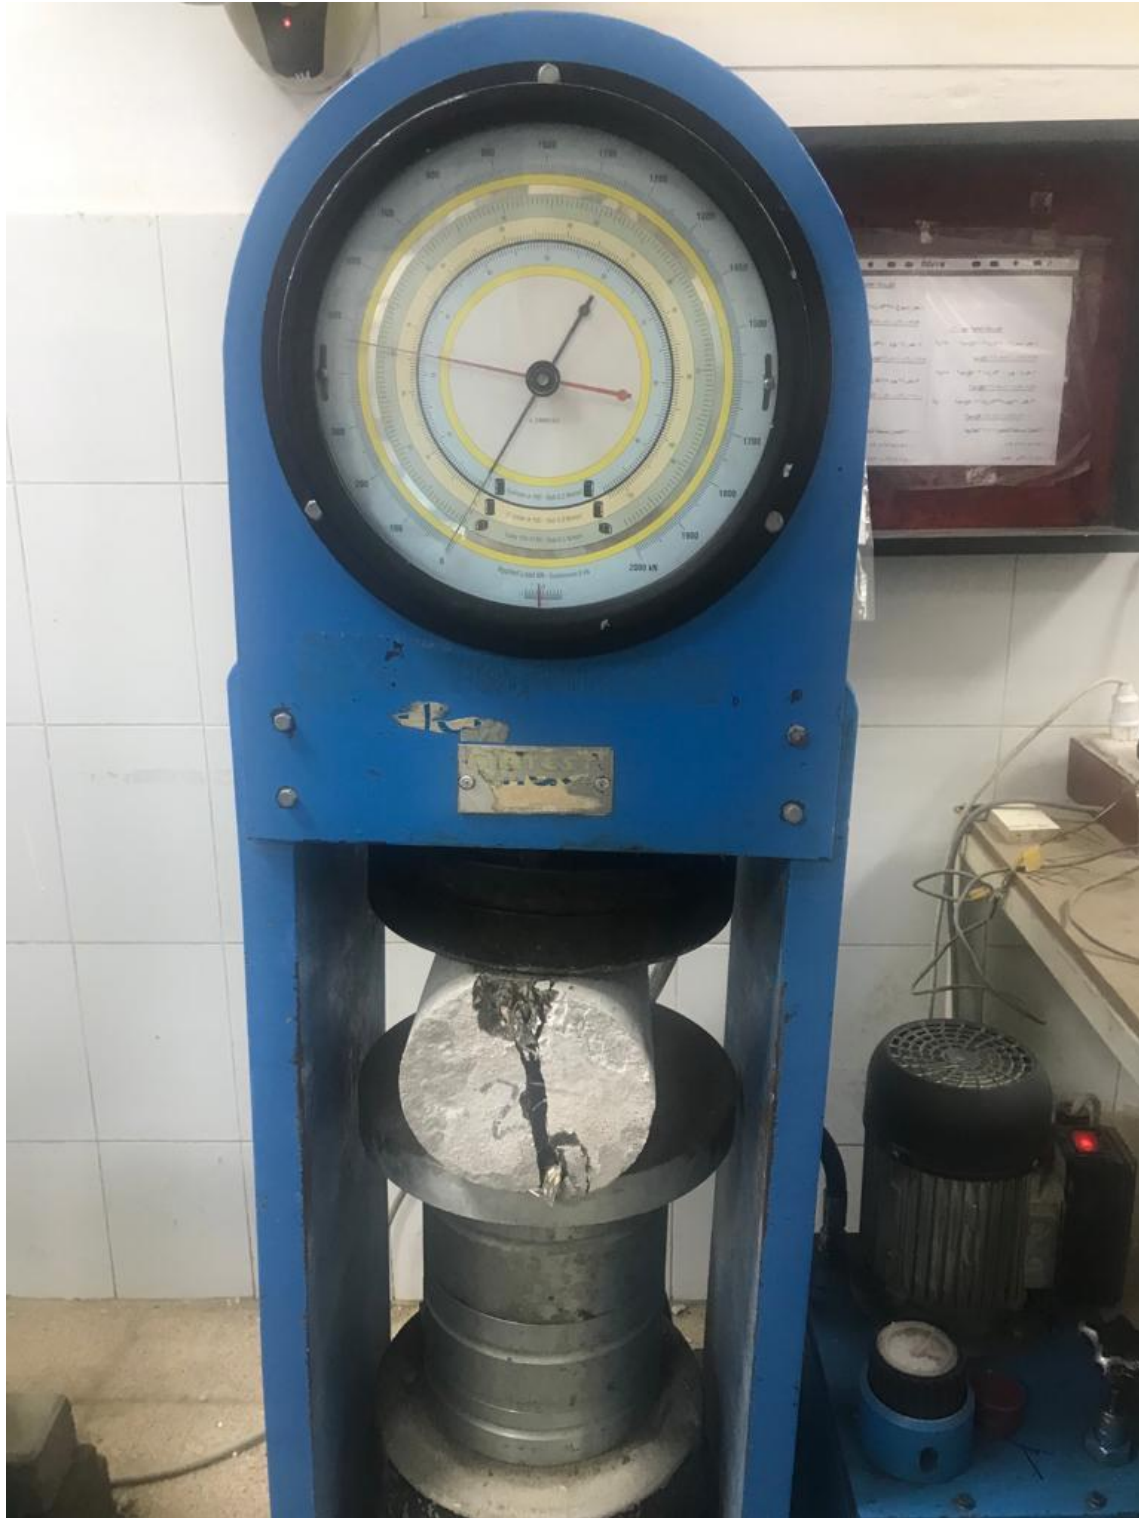

Figure S20: Sample tensile strength failure

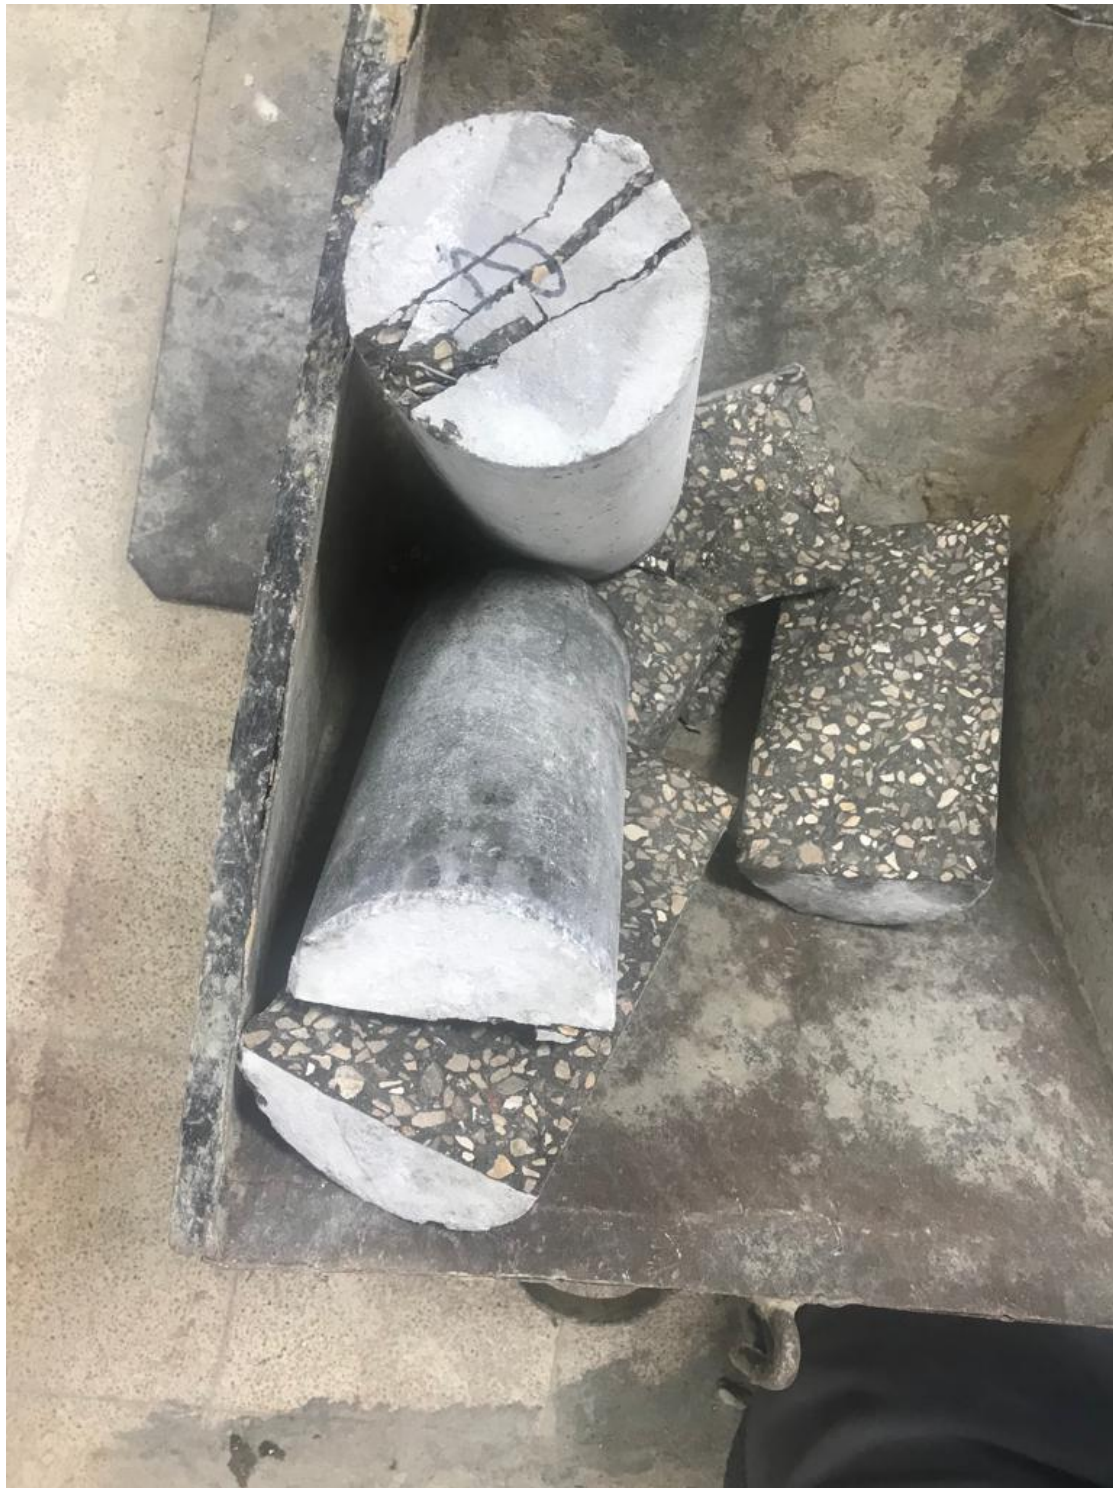

Figure S21: Sample tensile strength failure

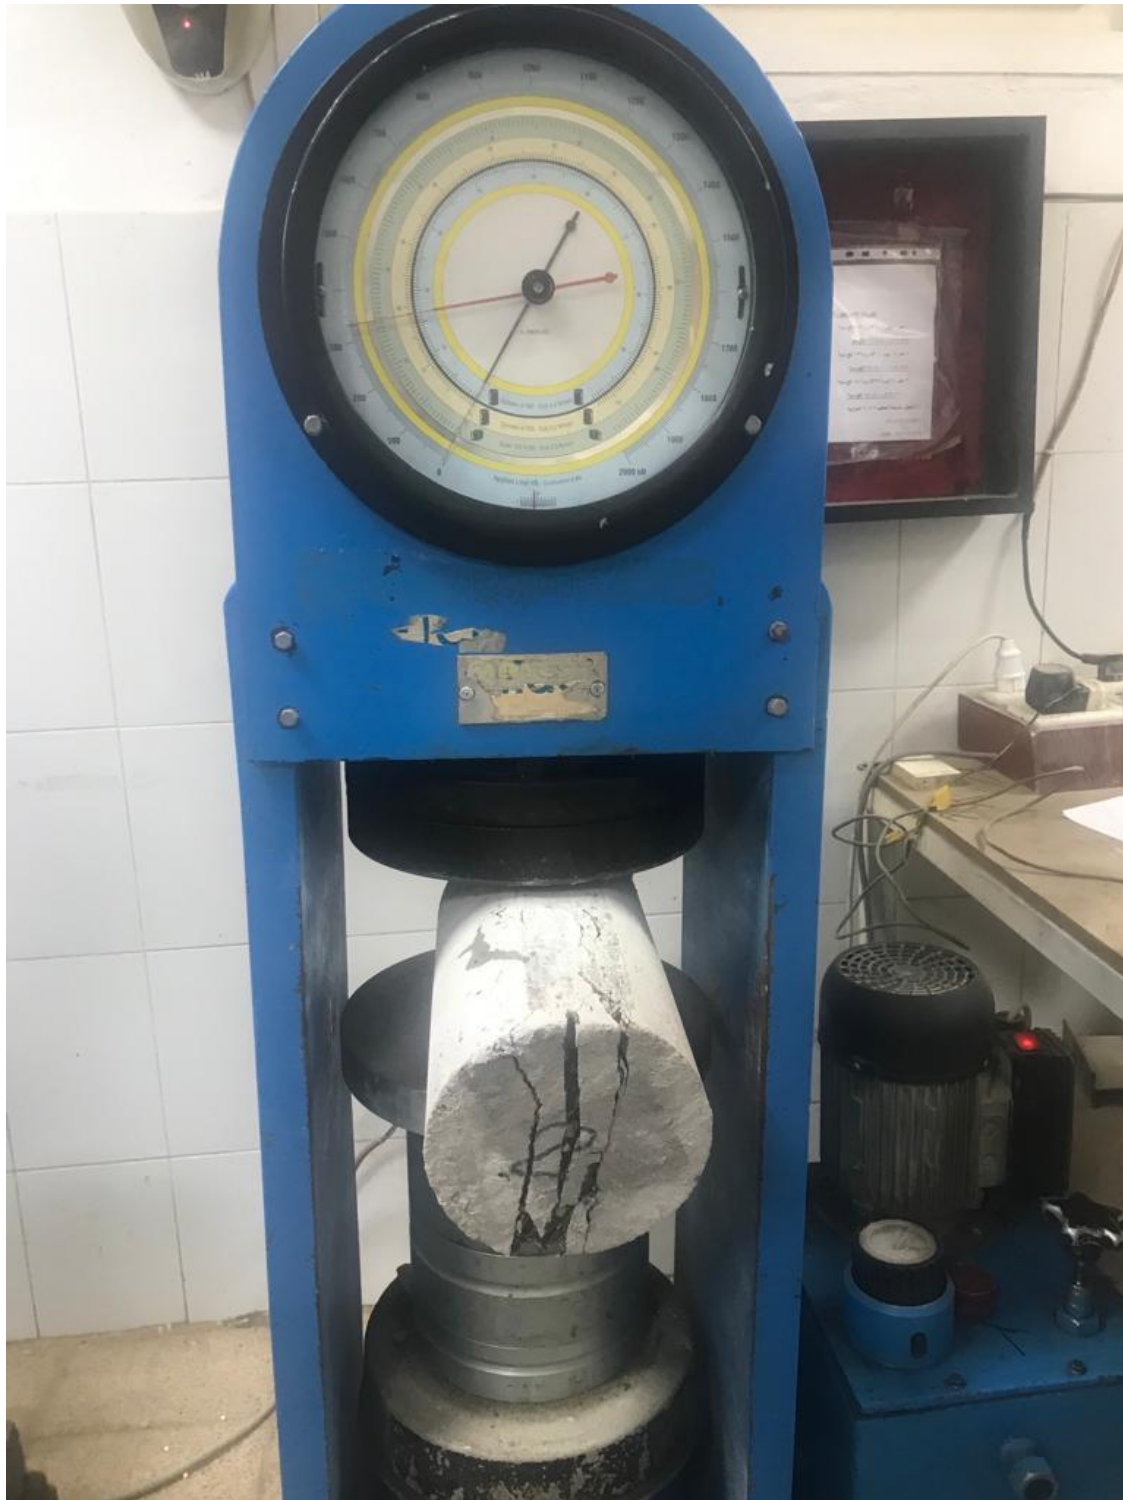

Figure S22: Sample tensile strength failure

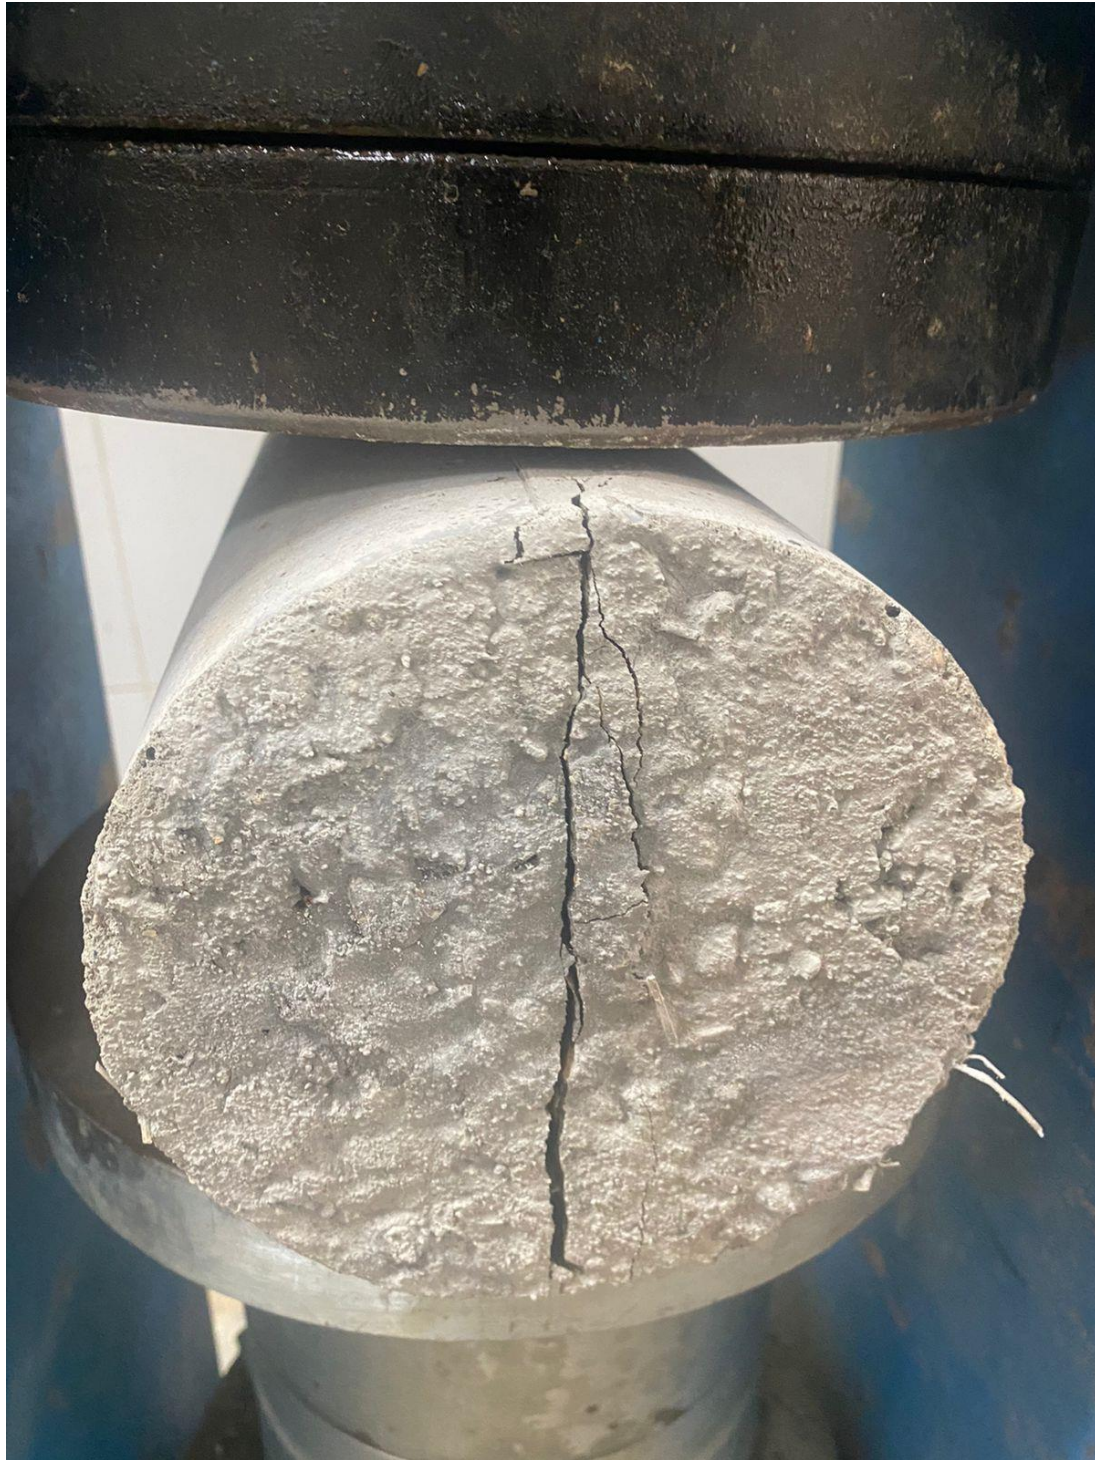

Figure S23: Sample tensile strength failure

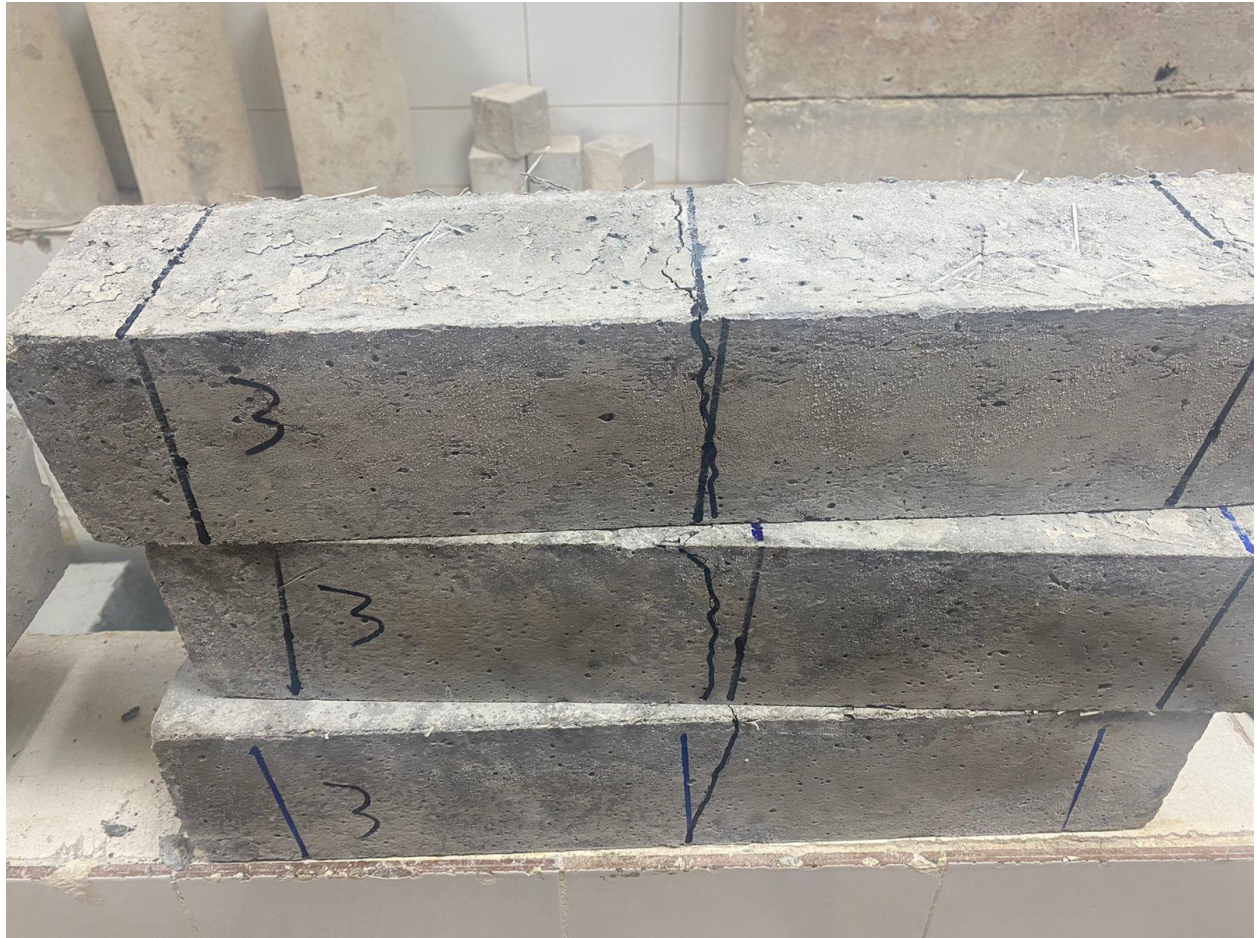

Figure S24: Sample flexural strength failure

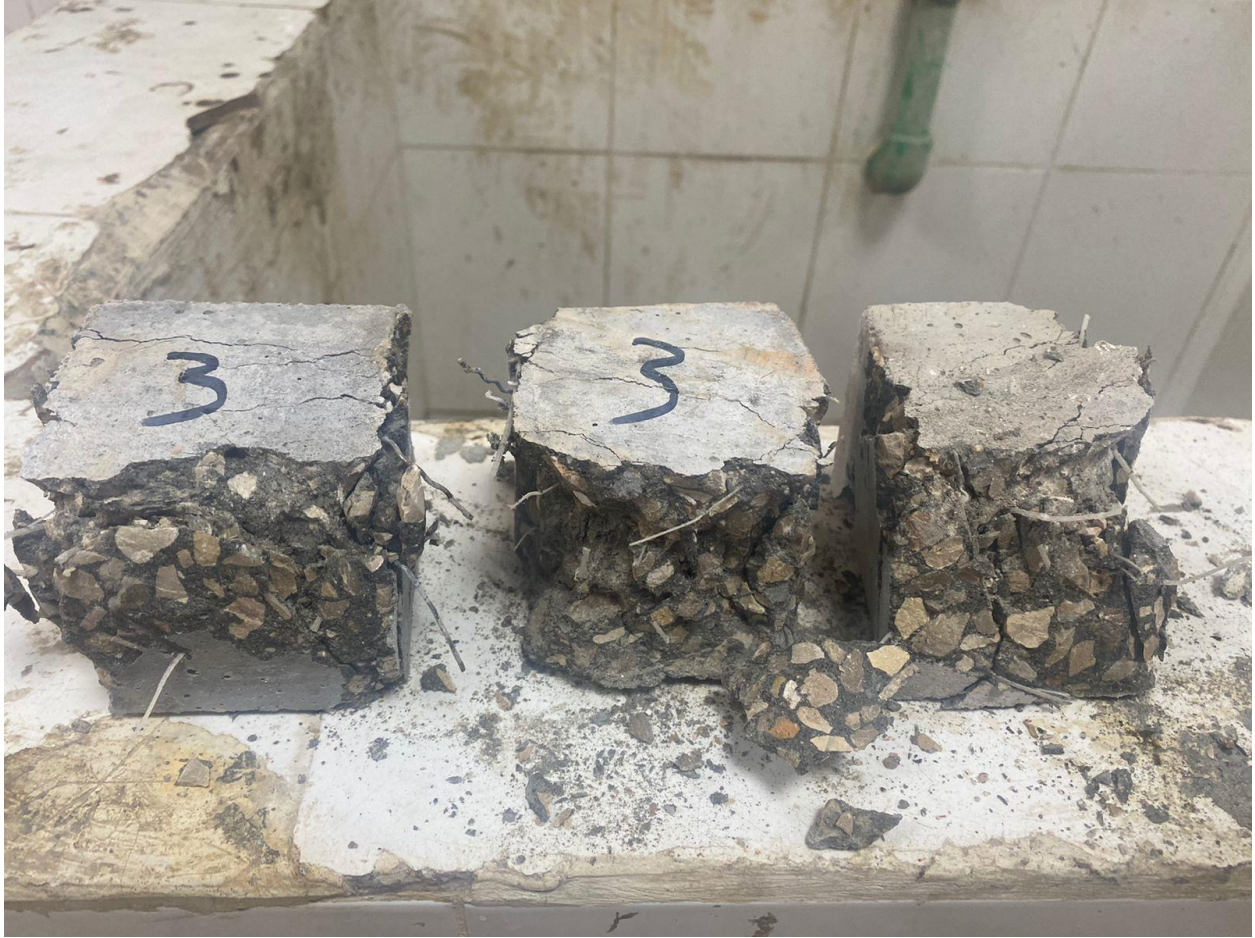

Figure S25: Sample compressive strength failure

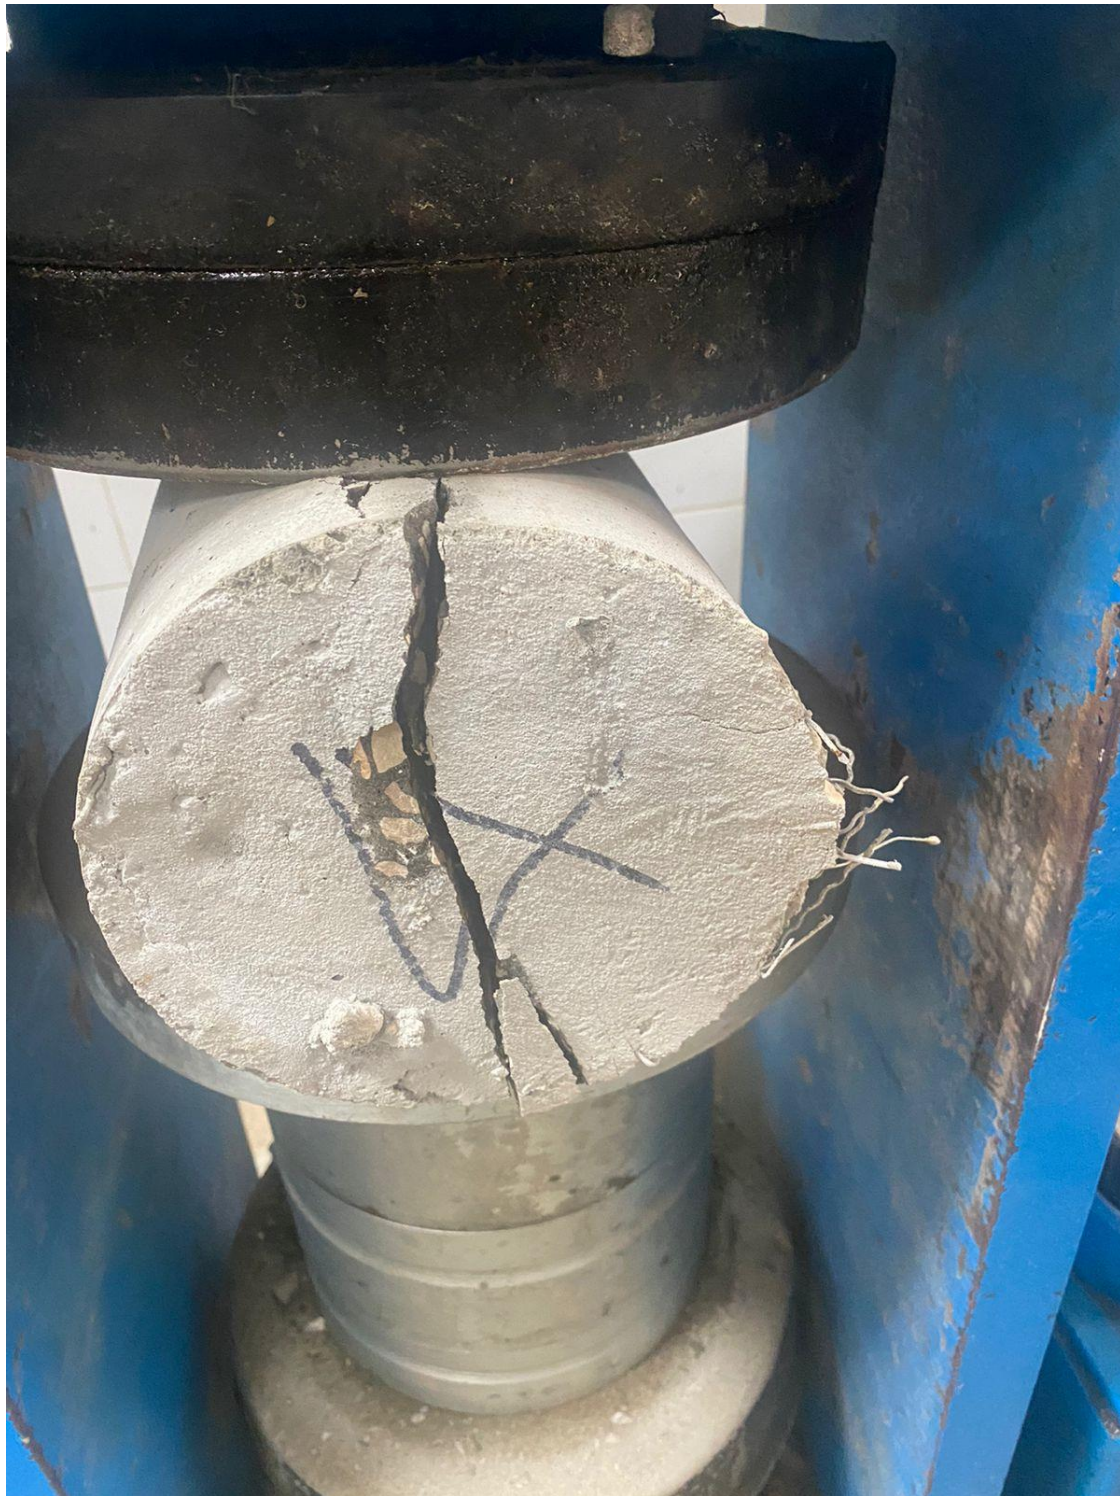

Figure S26: Sample tensile strength failure

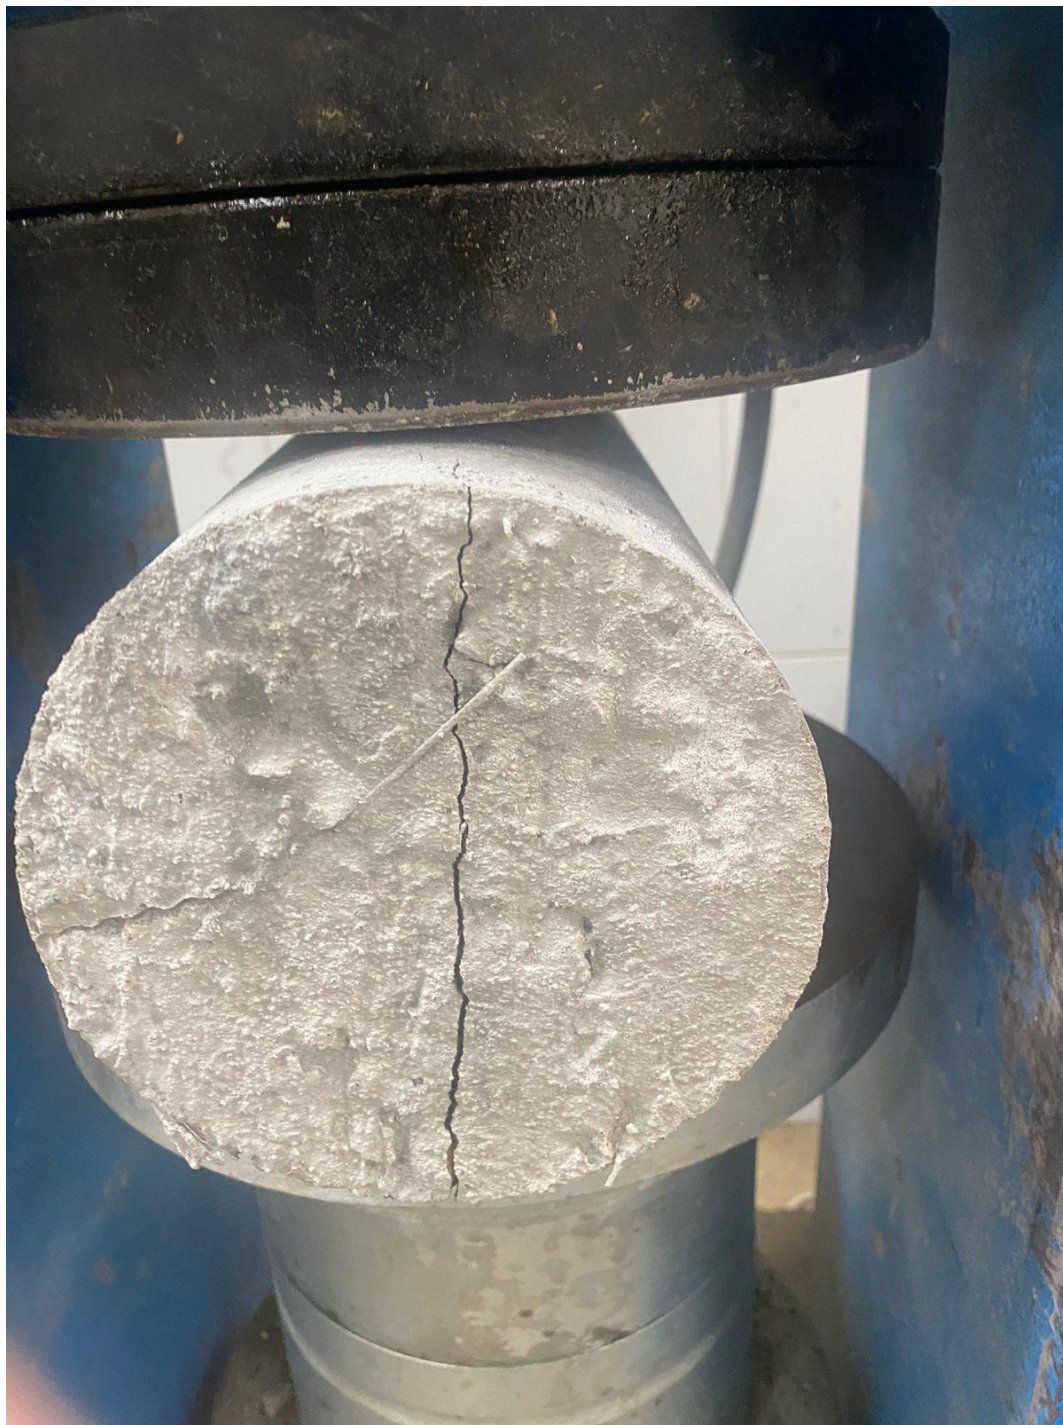

Figure S27: Sample tensile strength failure

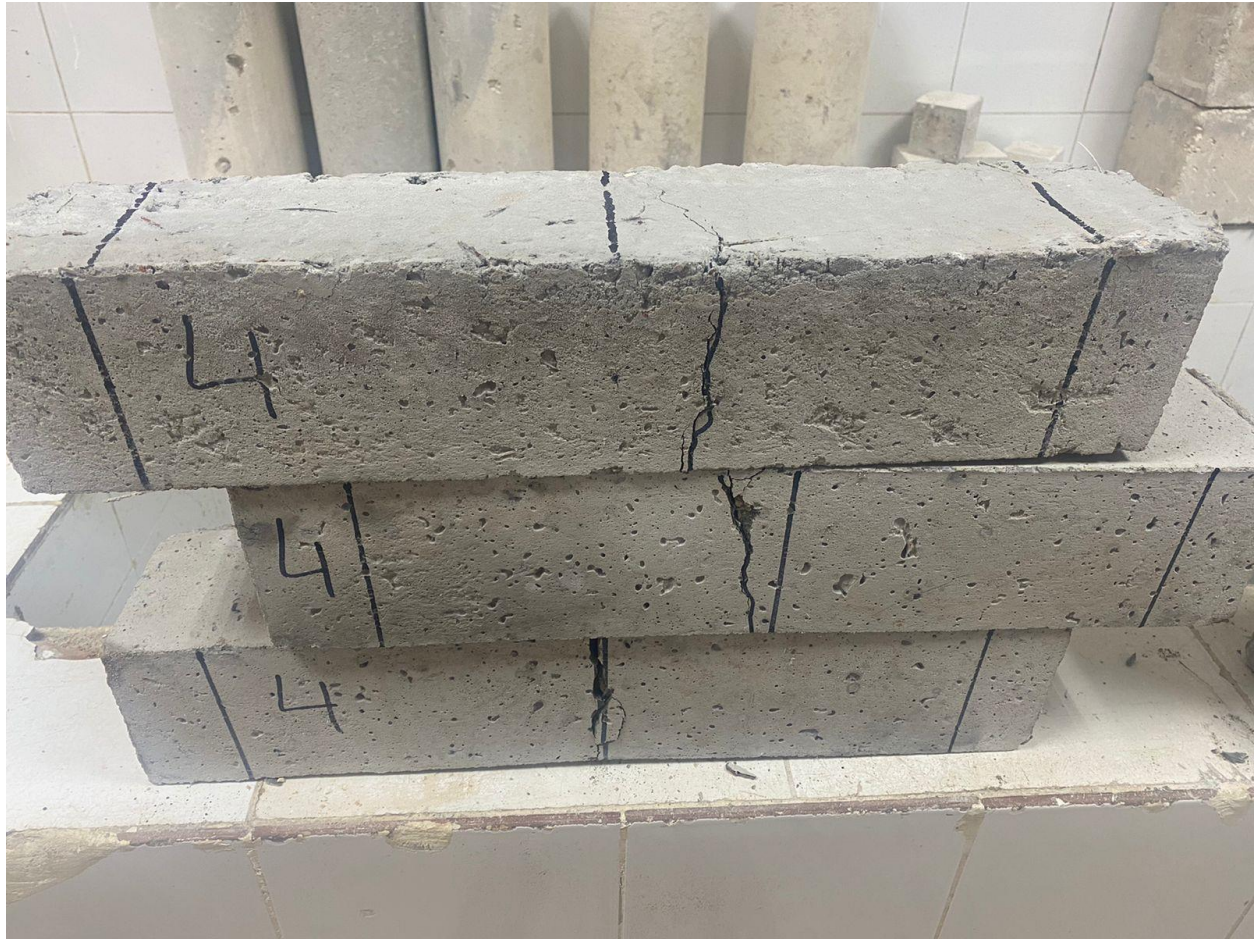

Figure S28: Sample flexural strength failure

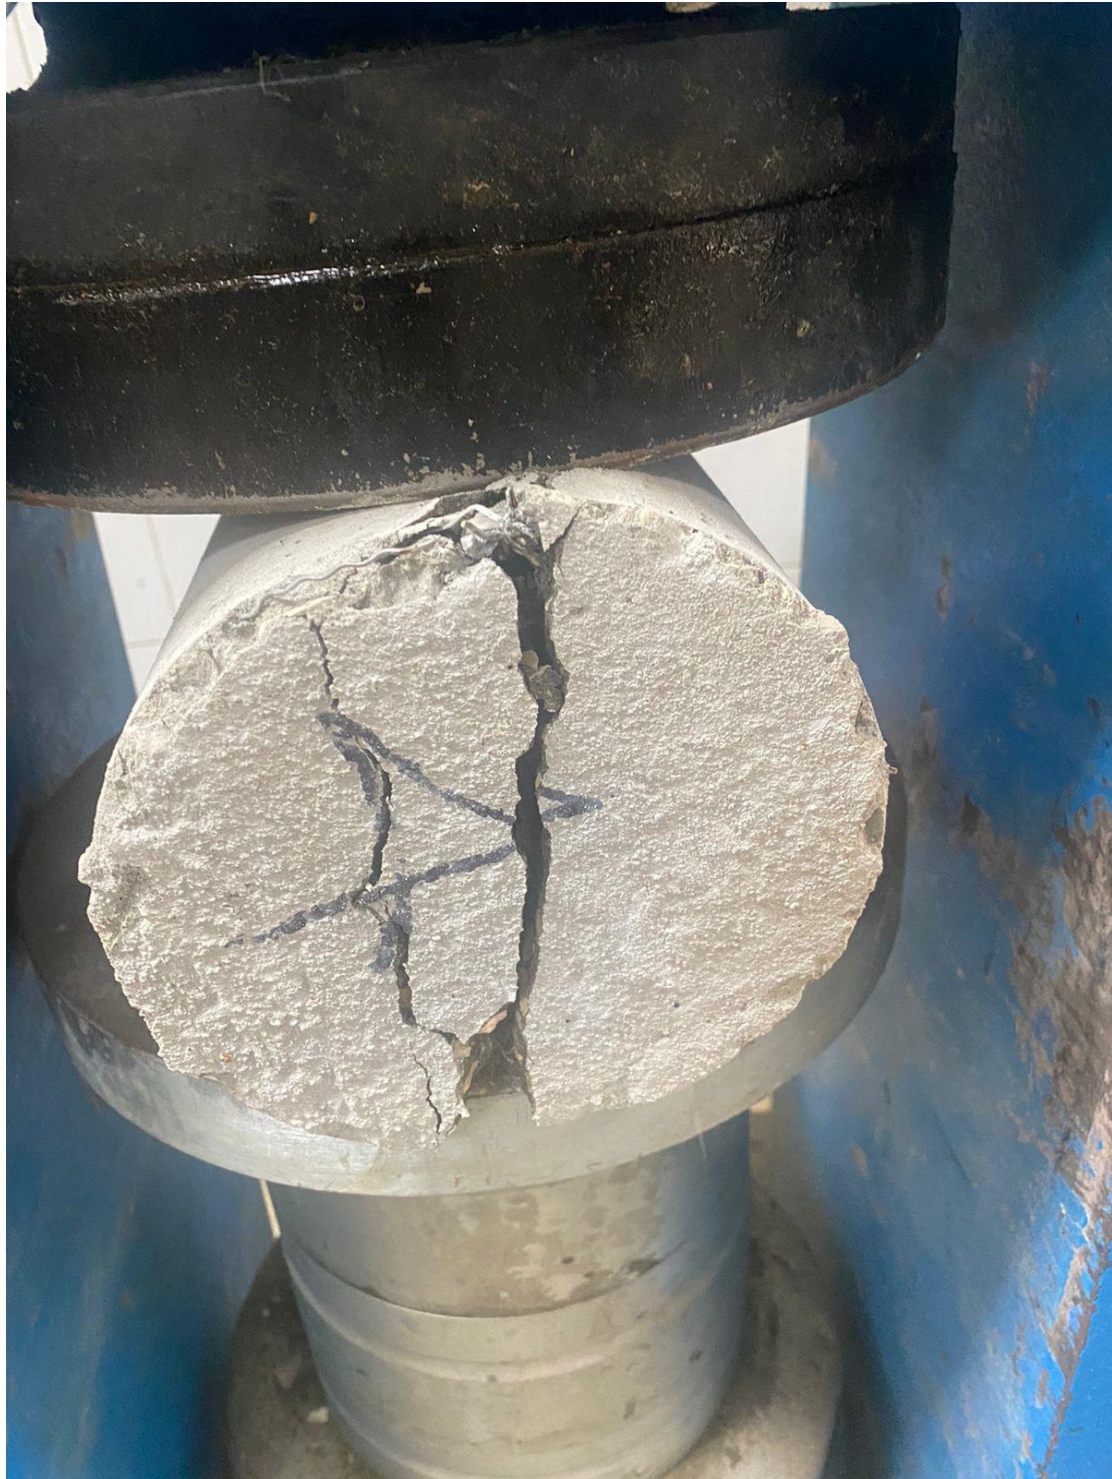

Figure S29: Sample tensile strength failure

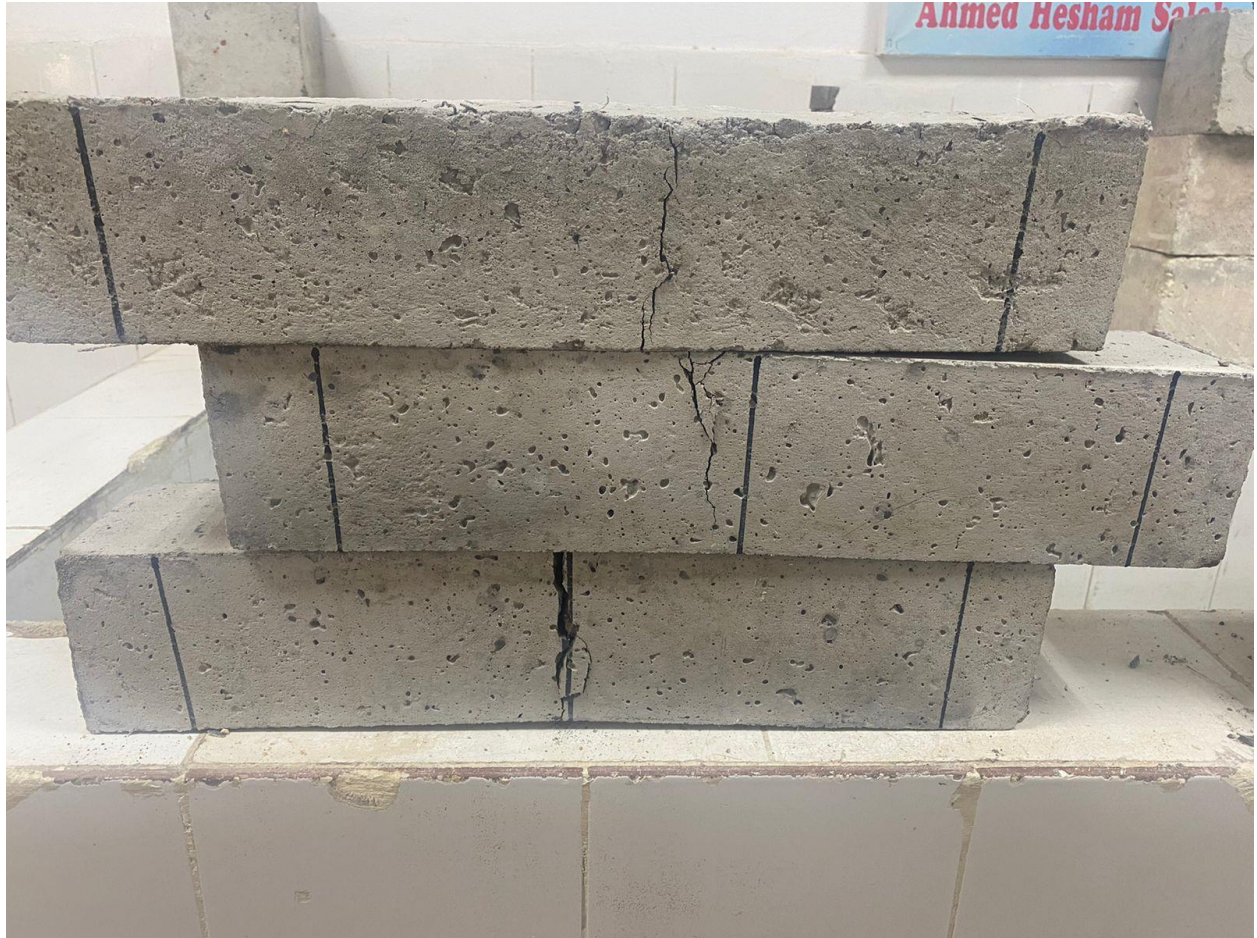

Figure S30: Sample flexural strength failure

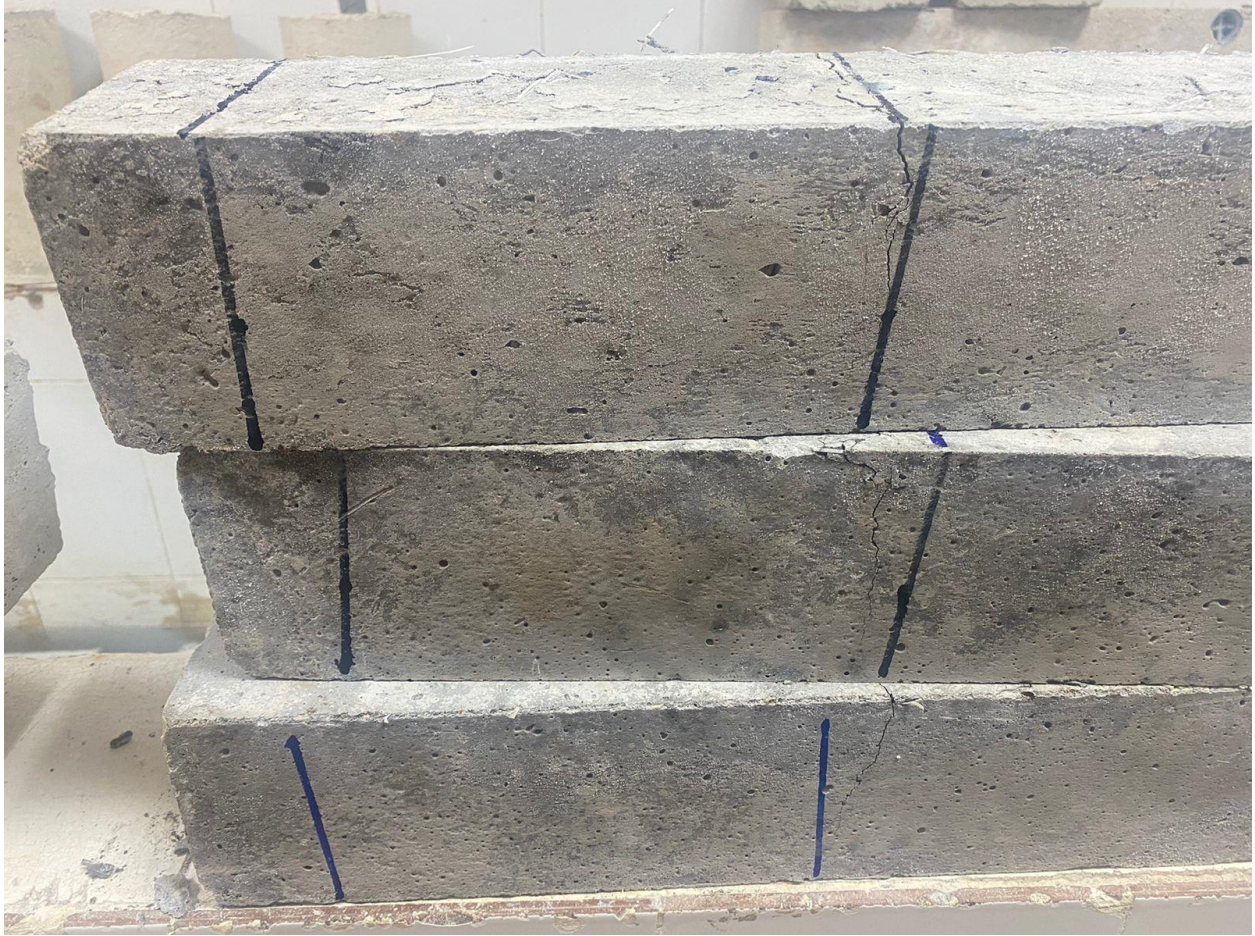

Figure S31: Sample flexural strength failure

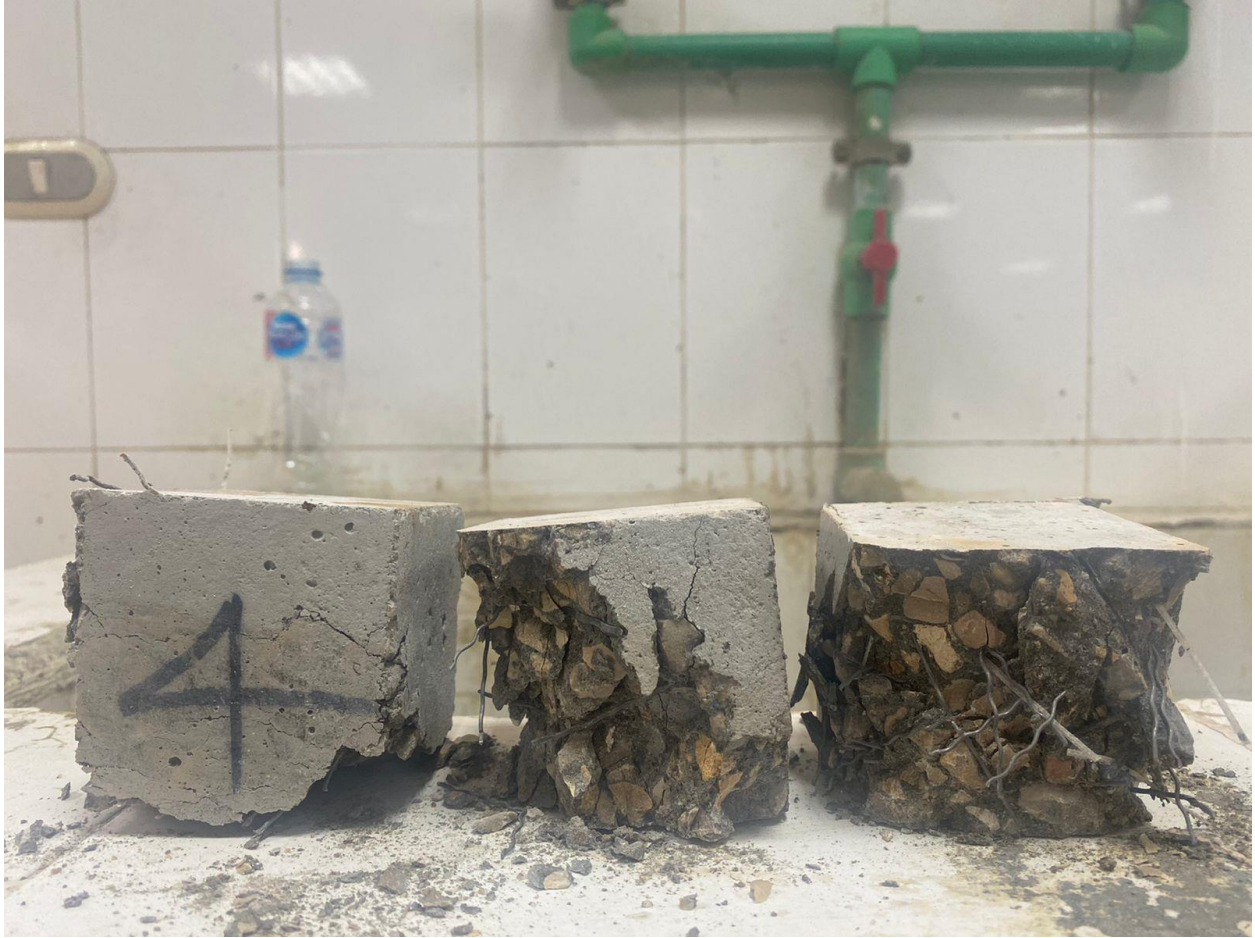

Figure S32: Sample compressive strength failure

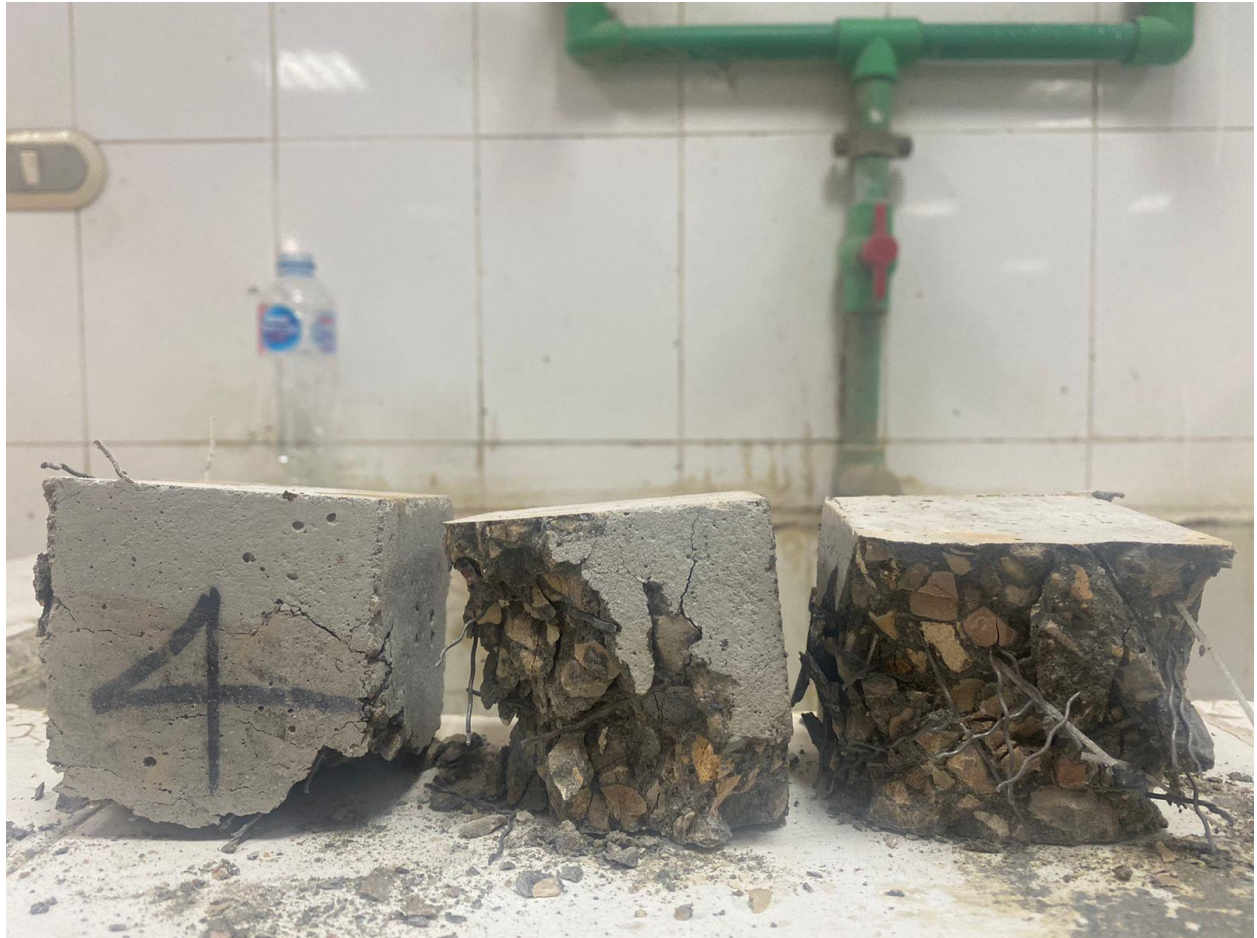

Figure S33: Sample compressive strength failure

# Fire

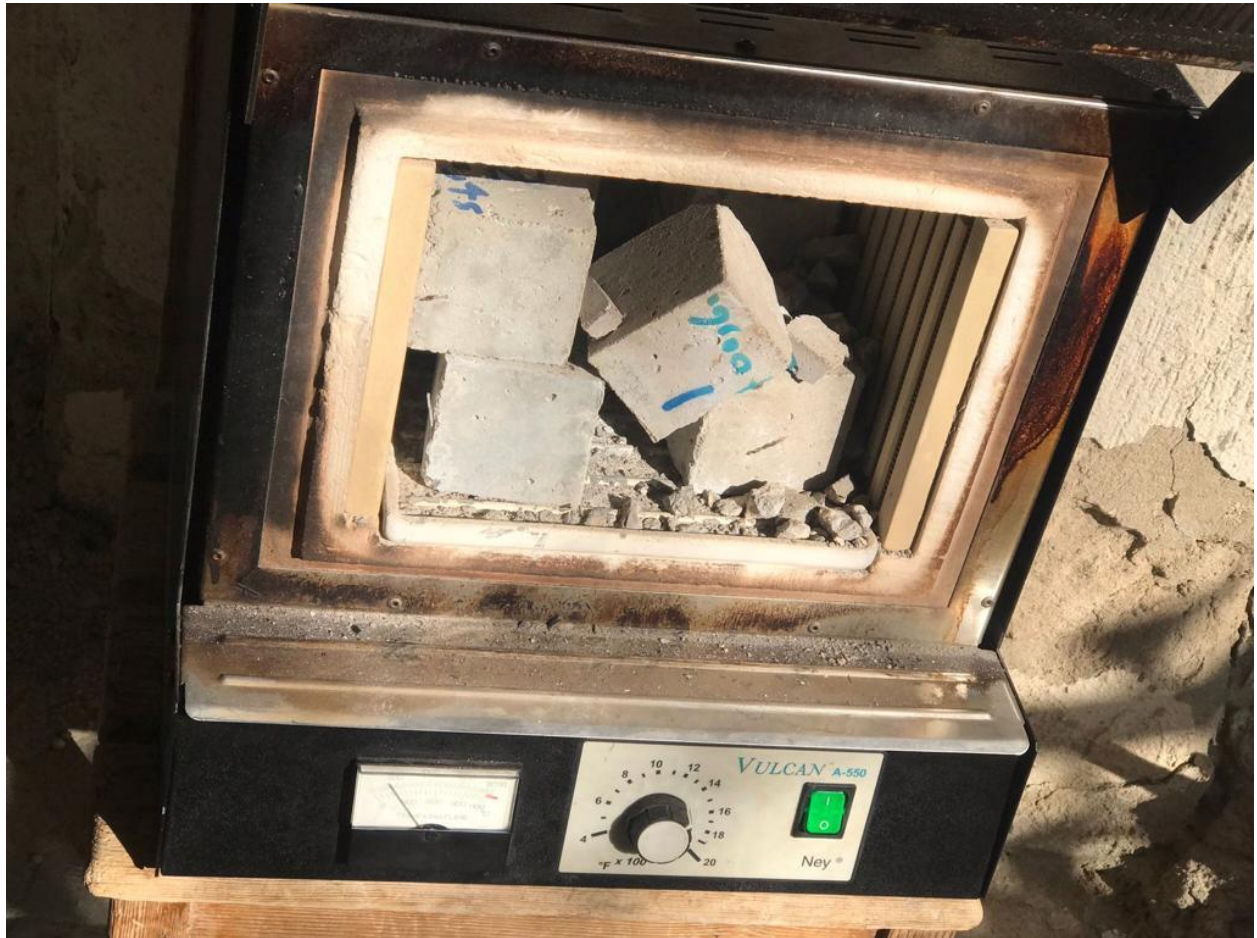

Figure S34: Sample specimen in heater

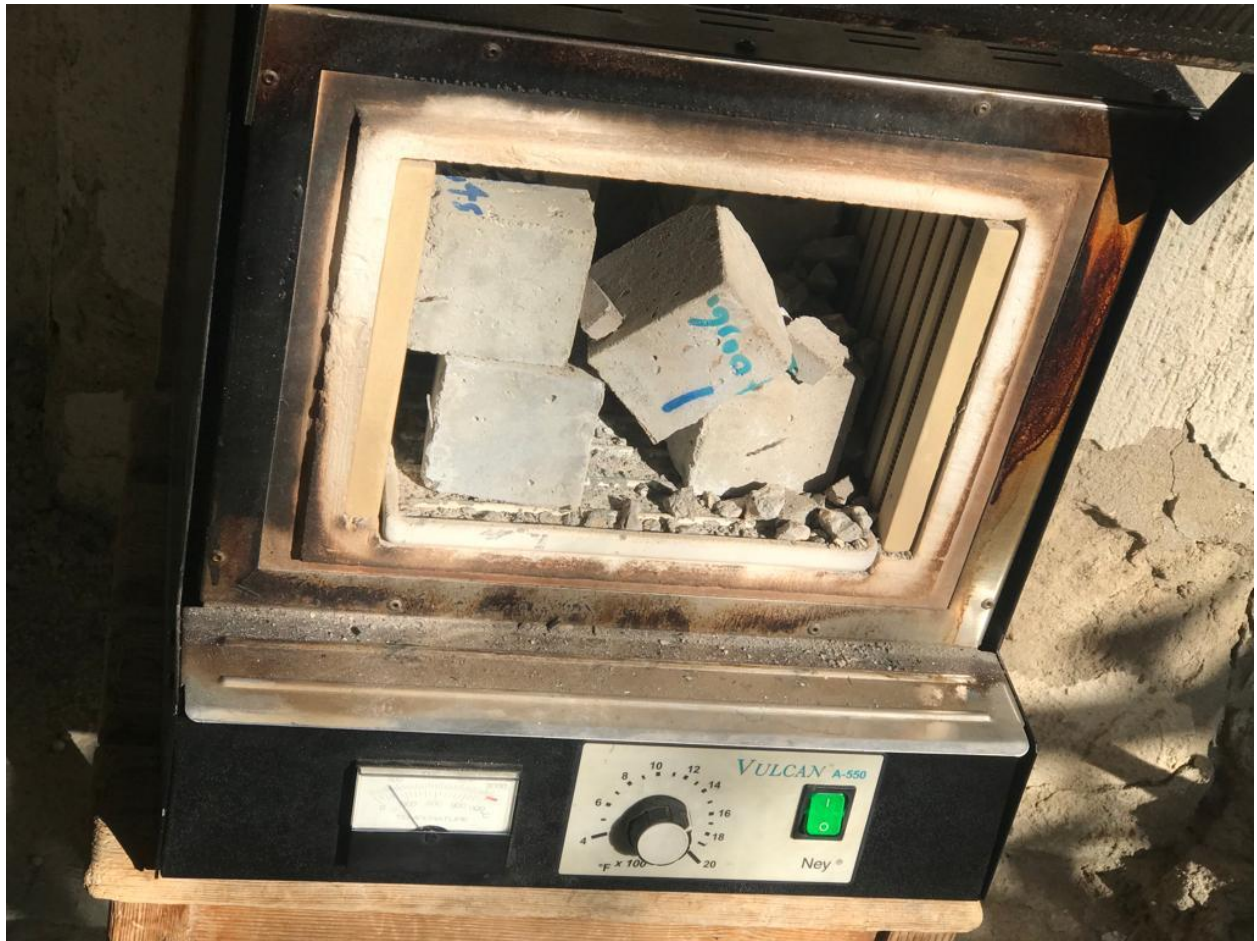

Figure S35: Sample specimen in heater

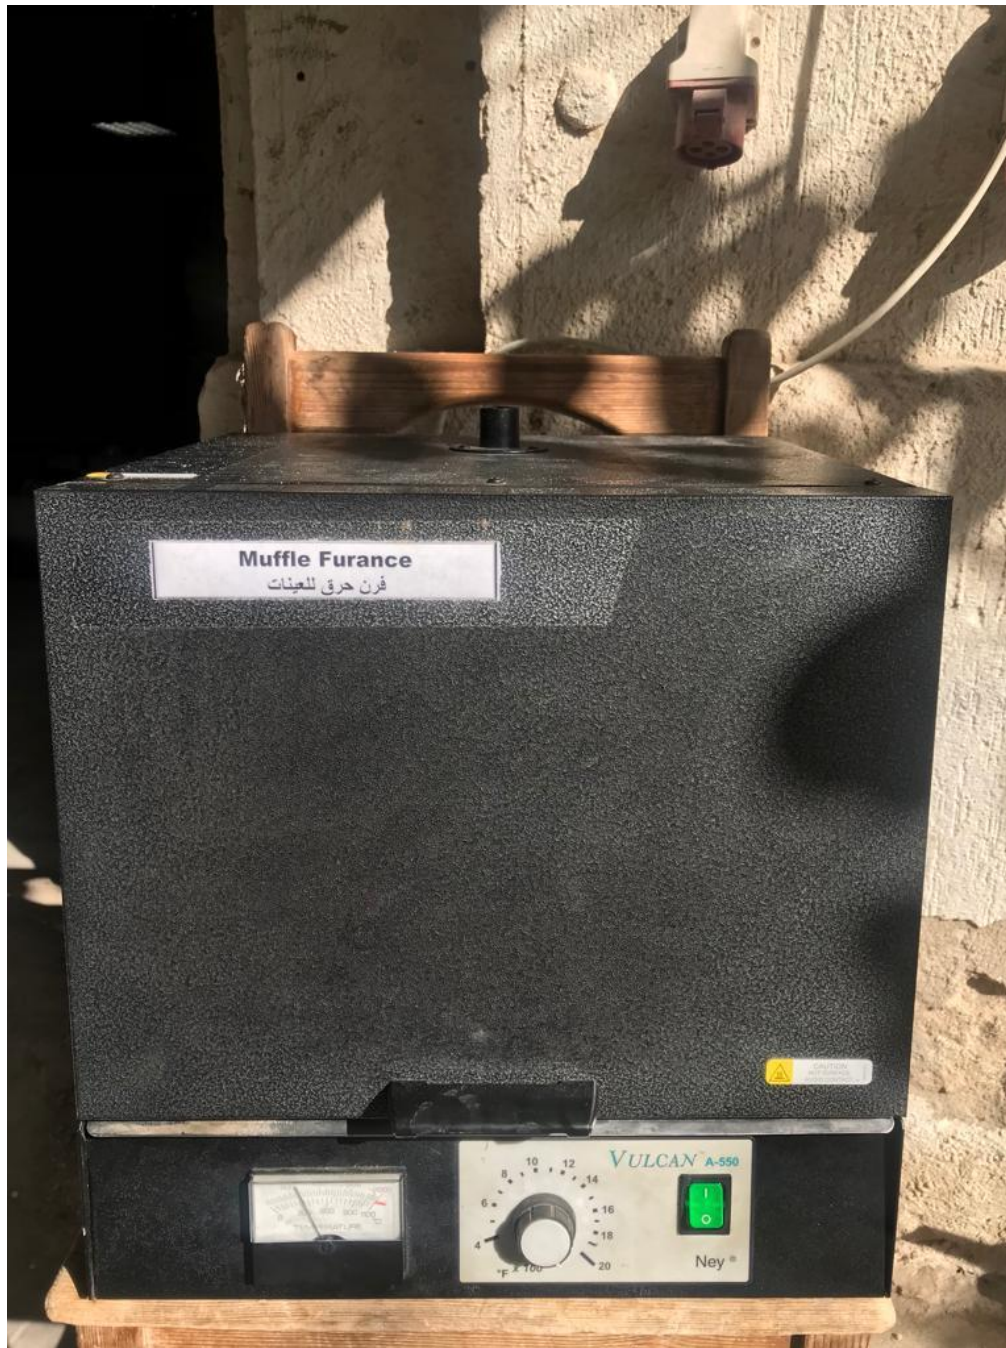

Figure S36: Sample specimen in heater

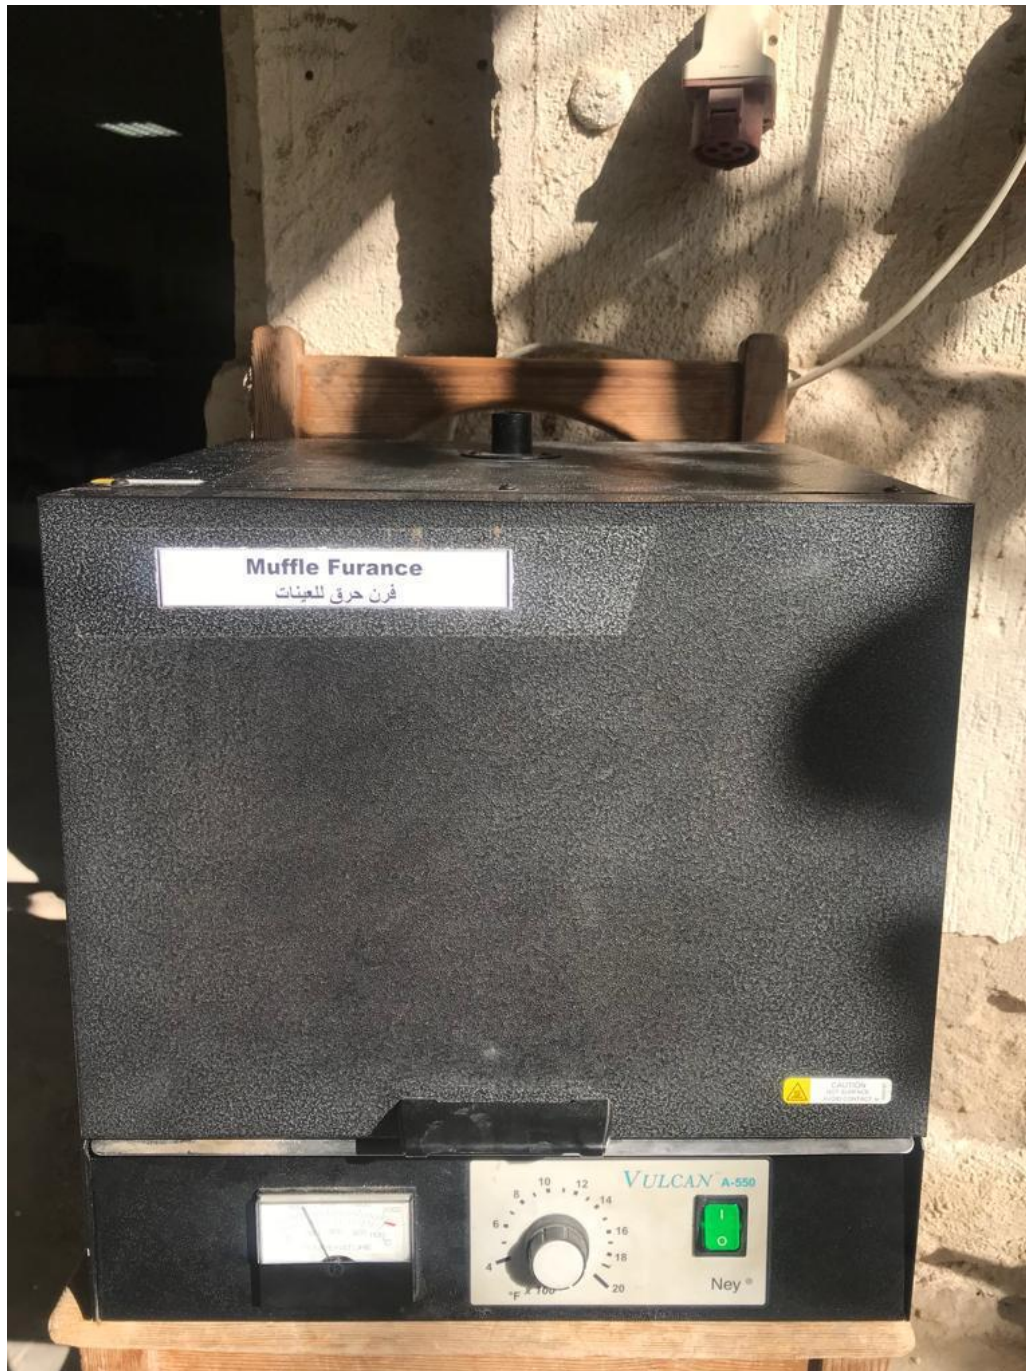

Figure S37: Sample specimen in heater
